# Supplementary material for: Assessing the role of substituents in ferrocene acylphosphines and their impact on gold-catalysed reactions
Source: Royal Society of Chemistry journal article supplement (doi:10.1039/d3nj00201b), 2023-01-01
Supplement: d3nj00201b1.pdf [file d3nj00201b1.pdf]

## Supporting Information

for

### Assessing the effect of substituents in ferrocene acylphosphines and their impact on gold-catalysed reactions

Petr Vosáhlo and Petr Štěpnička\*

#### Contents

|                           |      |
|---------------------------|------|
| X-ray crystallography     | S-2  |
| Buried volume calculation | S-7  |
| Copies of the NMR spectra | S-8  |
| References                | S-28 |

## X-ray crystallography

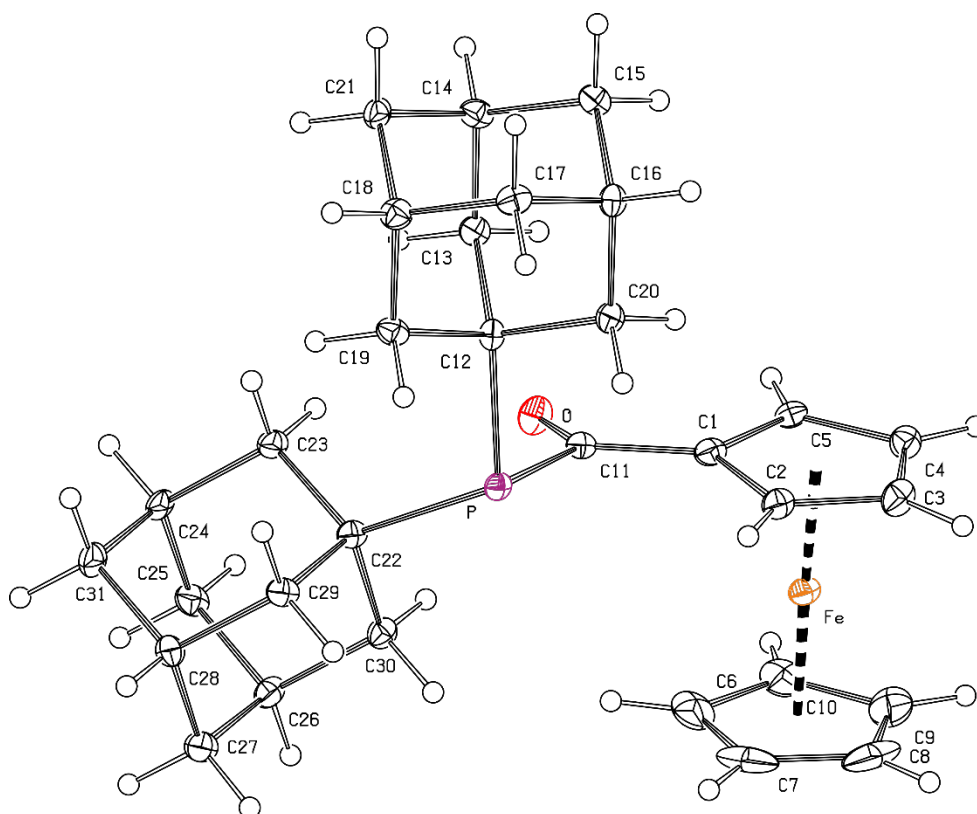

**Figure S1** PLATON plot of the molecular structure of **1c** (30% probability ellipsoids)

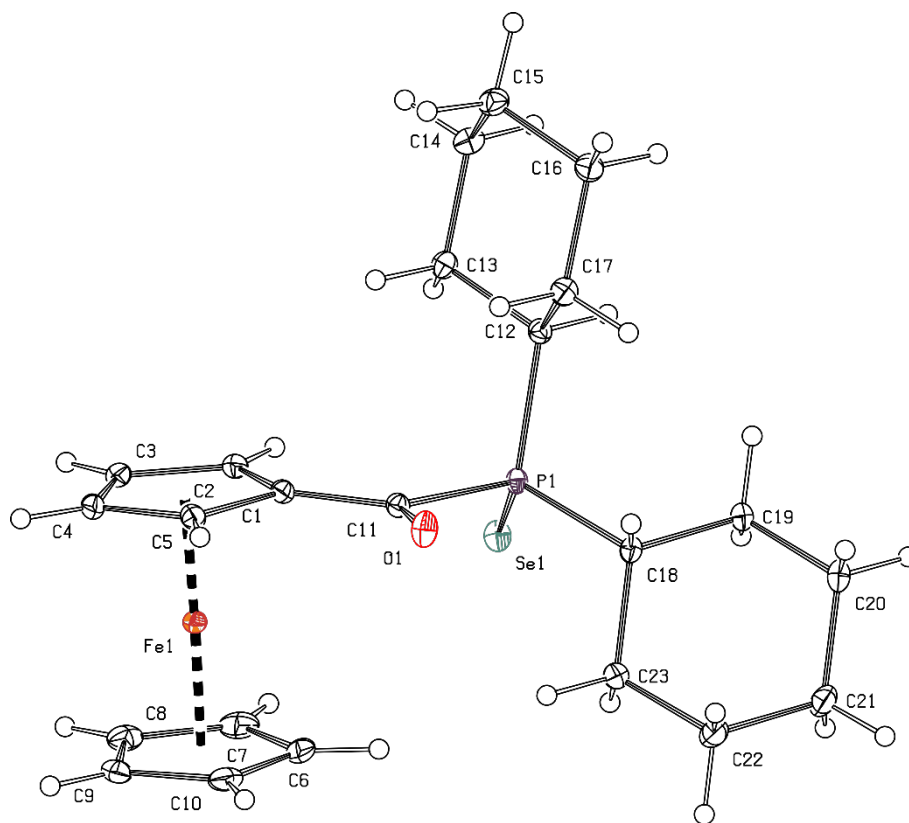

**Figure S2** PLATON plot of the molecular structure of **2b** (30% probability ellipsoids)

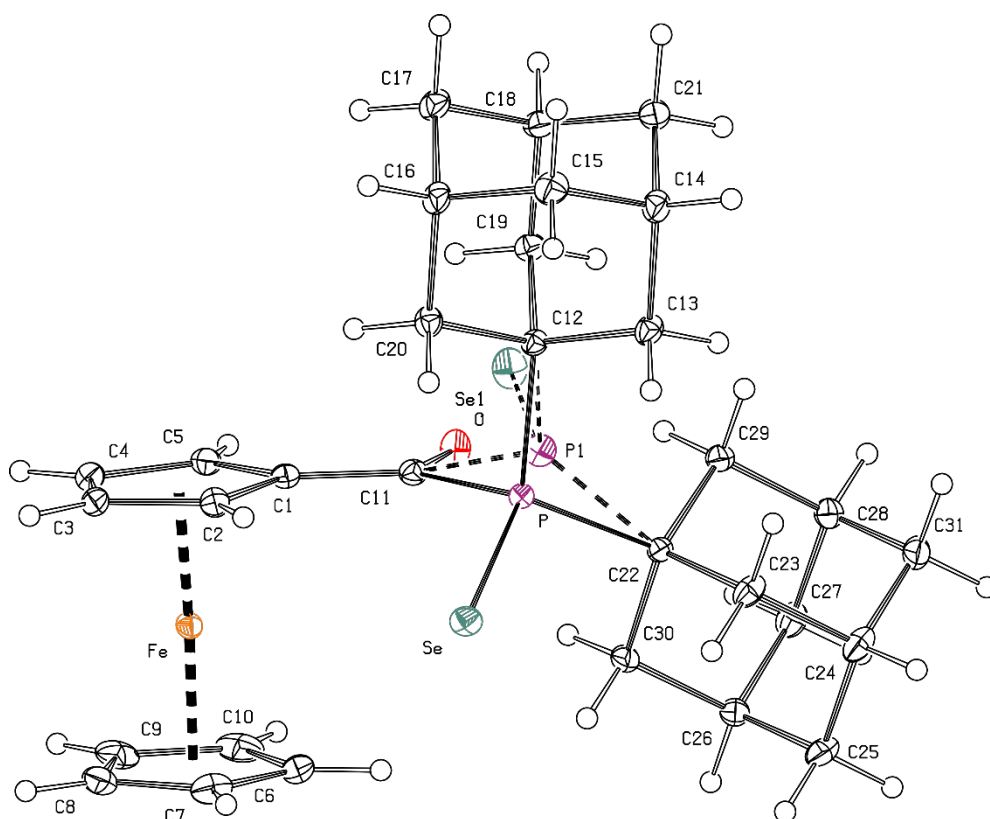

**Figure S3** PLATON plot of the molecular structure of **2c** (30% probability ellipsoids; both positions of the disordered P=Se moiety are shown)

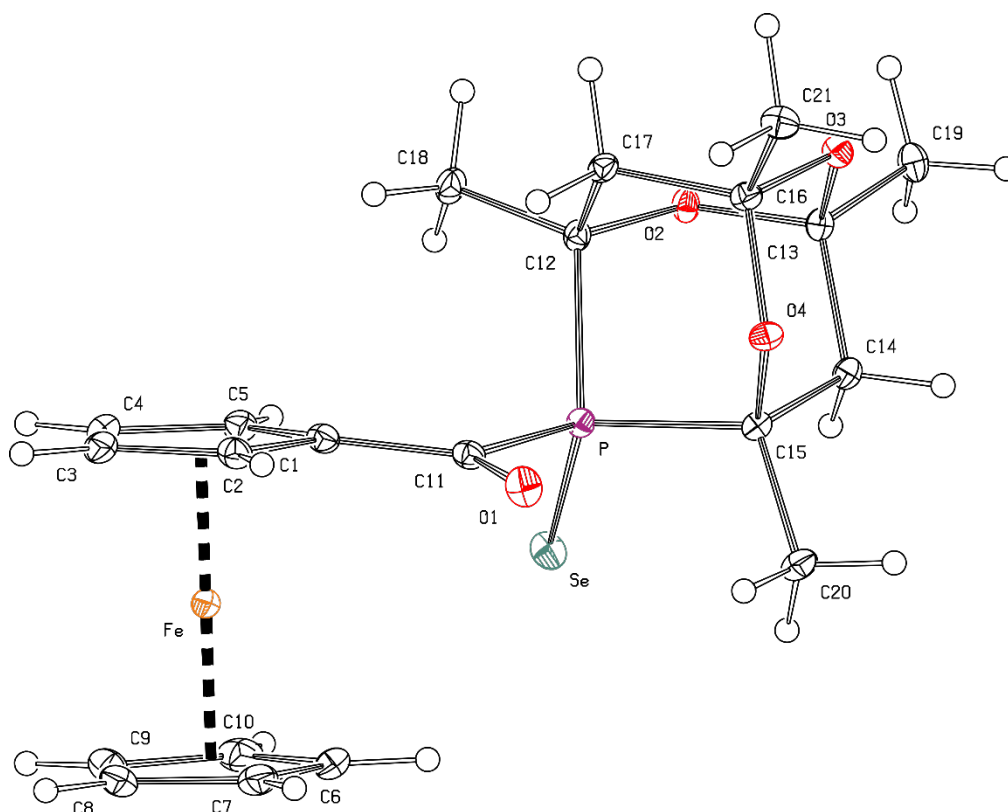

**Figure S4** PLATON plot of the molecular structure of **2d** (30% probability ellipsoids)

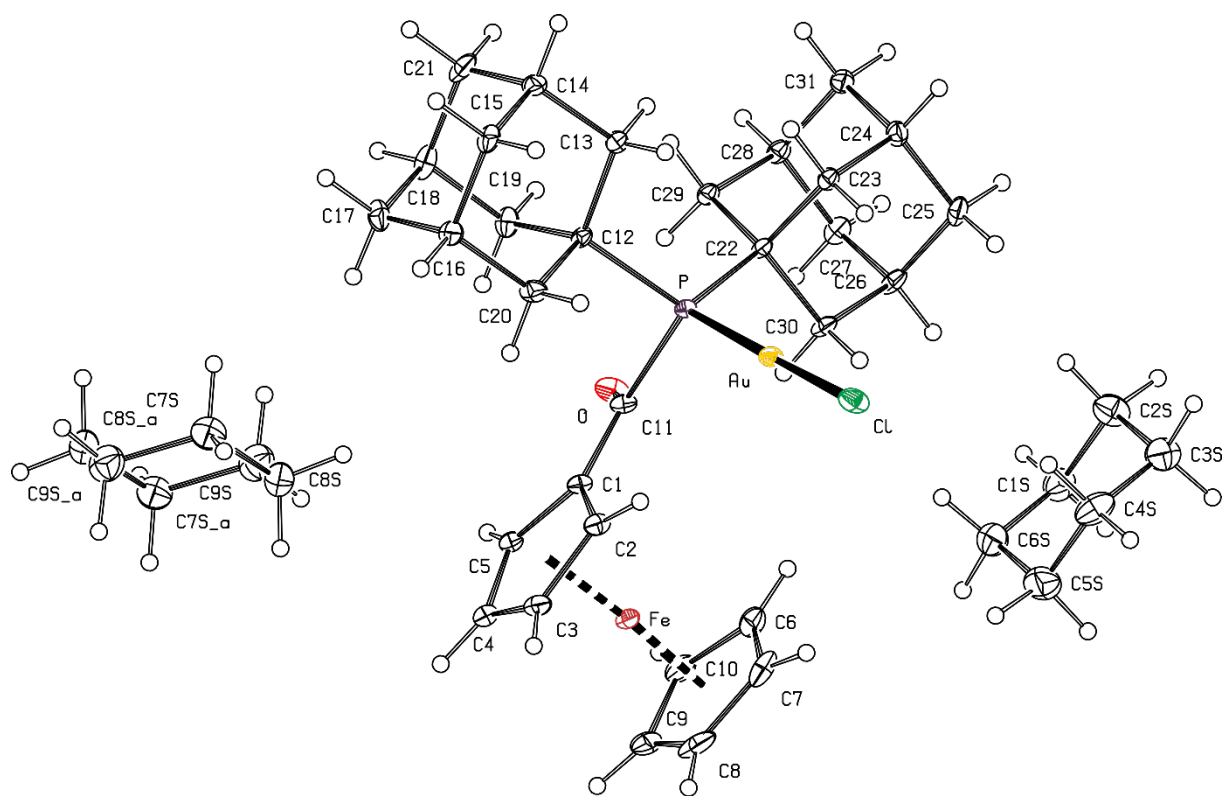

**Figure S5** PLATON plot of the molecular structure of **3c**·1.5C<sub>6</sub>H<sub>12</sub> (30% probability ellipsoids)

**Table S1.** Selected crystallographic data and structure refinement parameters.<sup>a</sup>

| Compound                                       | <b>1c</b>                                   | <b>2b</b>                                   | <b>2c</b>                                   |
|------------------------------------------------|---------------------------------------------|---------------------------------------------|---------------------------------------------|
| Formula                                        | C <sub>31</sub> H <sub>39</sub> FeOP        | C <sub>23</sub> H <sub>31</sub> FeOPSe      | C <sub>31</sub> H <sub>39</sub> FeOPSe      |
| <i>M</i>                                       | 514.44                                      | 489.26                                      | 593.40                                      |
| Crystal system                                 | monoclinic                                  | monoclinic                                  | monoclinic                                  |
| Space group                                    | <i>P</i> 2 <sub>1</sub> / <i>c</i> (no. 14) | <i>P</i> 2 <sub>1</sub> / <i>c</i> (no. 14) | <i>P</i> 2 <sub>1</sub> / <i>c</i> (no. 14) |
| <i>T</i> [K]                                   | 120 (2)                                     | 120(2)                                      | 120(2)                                      |
| <i>a</i> [Å]                                   | 10.8579(5)                                  | 14.2338(3)                                  | 13.6384(3)                                  |
| <i>b</i> [Å]                                   | 6.7355(3)                                   | 10.1725(2)                                  | 11.0185(3)                                  |
| <i>c</i> [Å]                                   | 34.096(2)                                   | 15.2719(3)                                  | 17.3274(4)                                  |
| $\alpha$ [°]                                   |                                             |                                             |                                             |
| $\beta$ [°]                                    | 98.833(3)                                   | 95.577(1)                                   | 98.677(1)                                   |
| $\gamma$ [°]                                   |                                             |                                             |                                             |
| <i>V</i> [Å <sup>3</sup> ]                     | 2464.0(2)                                   | 2200.80(8)                                  | 2574.1(1)                                   |
| <i>Z</i>                                       | 4                                           | 4                                           | 4                                           |
| $\mu$ (Mo K $\alpha$ ) [mm <sup>-1</sup> ]     | 5.681                                       | 2.422                                       | 2.086                                       |
| Diffns collected                               | 30648                                       | 23550                                       | 38493                                       |
| Independent diffns                             | 5067                                        | 5023                                        | 5888                                        |
| Observed <sup>a</sup> diffns                   | 4821                                        | 4799                                        | 5643                                        |
| <i>R</i> <sub>int</sub> <sup>b</sup> [%]       | 6.40                                        | 1.60                                        | 1.98                                        |
| No. of parameters                              | 308                                         | 244                                         | 335                                         |
| <i>R</i> <sup>b</sup> obsd diffns [%]          | 6.74                                        | 1.69                                        | 2.62                                        |
| <i>R</i> , <i>wR</i> <sup>b</sup> all data [%] | 7.19, 17.26                                 | 1.79, 4.39                                  | 2.74, 5.98                                  |
| $\Delta\rho$ [e Å <sup>-3</sup> ]              | 0.527, -1.254                               | 0.339, -0.240                               | 0.751, -0.398                               |

<sup>a</sup> Diffractions with  $I > 2\sigma(I)$ . <sup>b</sup> Definitions:  $R_{\text{int}} = \frac{\sum |F_o^2 - F_o^2(\text{mean})|}{\sum F_o^2}$ , where  $F_o^2(\text{mean})$  is the average intensity of symmetry-equivalent diffractions.  $R = \frac{\sum ||F_o| - |F_c||}{\sum |F_o|}$ ,  $wR = [\frac{\sum \{w(F_o^2 - F_c^2)^2\}}{\sum w(F_o^2)^2}]^{1/2}$ .

**Table S1 continued**

| Compound                                       | <b>2d</b>                                            | <b>3c</b> ·1.5C <sub>6</sub> H <sub>12</sub>                               |
|------------------------------------------------|------------------------------------------------------|----------------------------------------------------------------------------|
| Formula                                        | C <sub>21</sub> H <sub>25</sub> FeO <sub>4</sub> PSe | C <sub>31</sub> H <sub>39</sub> AuClFeOP·1.5C <sub>6</sub> H <sub>12</sub> |
| <i>M</i>                                       | 507.19                                               | 873.09                                                                     |
| Crystal system                                 | triclinic                                            | triclinic                                                                  |
| Space group                                    | <i>P</i> –1 (no. 2)                                  | <i>P</i> –1 (no. 2)                                                        |
| <i>T</i> [K]                                   | 150(2)                                               | 120(2)                                                                     |
| <i>a</i> [Å]                                   | 7.5245(4)                                            | 11.2049(9)                                                                 |
| <i>b</i> [Å]                                   | 8.1925(4)                                            | 12.206(1)                                                                  |
| <i>c</i> [Å]                                   | 18.405(1)                                            | 13.816(1)                                                                  |
| $\alpha$ [°]                                   | 78.114(2)                                            | 82.383(2)                                                                  |
| $\beta$ [°]                                    | 82.669(2)                                            | 78.024(2)                                                                  |
| $\gamma$ [°]                                   | 63.498(2)                                            | 76.254(2)                                                                  |
| <i>V</i> [Å <sup>3</sup> ]                     | 992.76(9)                                            | 1788.5(2)                                                                  |
| <i>Z</i>                                       | 2                                                    | 2                                                                          |
| $\mu$ (Mo K $\alpha$ ) [mm <sup>-1</sup> ]     | 2.699                                                | 4.653                                                                      |
| Diffns collected                               | 44878                                                | 131798                                                                     |
| Independent diffns                             | 4565                                                 | 8225                                                                       |
| Observed <sup>a</sup> diffns                   | 4457                                                 | 7975                                                                       |
| <i>R</i> <sub>int</sub> <sup>b</sup> [%]       | 2.38                                                 | 5.06                                                                       |
| No. of parameters                              | 257                                                  | 407                                                                        |
| <i>R</i> <sup>b</sup> obsd diffns [%]          | 1.75                                                 | 2.96                                                                       |
| <i>R</i> , <i>wR</i> <sup>b</sup> all data [%] | 1.80, 4.67                                           | 3.06, 9.37                                                                 |
| $\Delta\rho$ [e Å <sup>-3</sup> ]              | 0.383, -0.248                                        | 1.602, -1.423                                                              |

## Buried volume calculation

Buried volumes ( $V_{\text{bur}}$ ) for individual ligands were calculated using the crystal structure coordinates of selenides **2a-d**, for which a complete series was available. To minimise the influence of ferrocenyl group orientation, which also affects the ligand sterics, the buried volume was determined by a unified approach as follows: the C(O)–P bond was oriented in East-West direction with the ferrocenyl group in the East part and the phosphine substituents in the West section as illustrated in Figure S6. The  $V_{\text{bur}}$  presented here is an average of  $V_{\text{bur}}$  estimated in the NW and SW quadrants by SambVca 2.1 web tool (Table S2).<sup>1</sup> The following parameters were used: P–Au distance 2.28 Å, sphere radius 3.50 Å, hydrogen atoms omitted, bond radii scaled by 1.17.

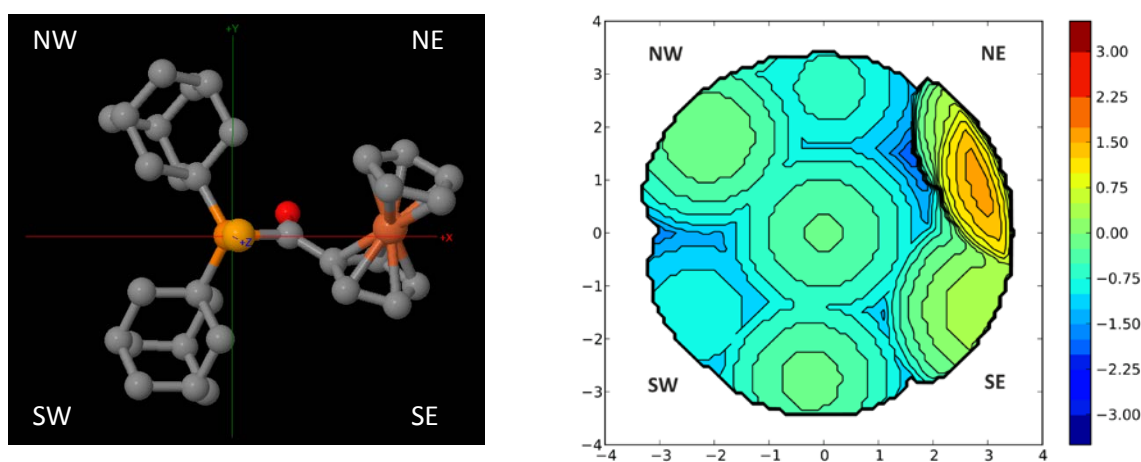

**Figure S6** (left) Setting for  $V_{\text{bur}}$  estimation from the crystal structure data illustrated for compound **2c** and (right) the calculated steric map<sup>2</sup>

**Table S2** Partial and average  $V_{\text{bur}}$  values

| Parameter                        | <b>2a</b>   | <b>2b</b>   | <b>2c</b>   | <b>2d</b>   |
|----------------------------------|-------------|-------------|-------------|-------------|
| $V_{\text{bur}}(\text{NW})$ [%]  | 31.6        | 28.5        | 40.1        | 30.2        |
| $V_{\text{bur}}(\text{SW})$ [%]  | 36.0        | 33.7        | 35.9        | 30.6        |
| $V_{\text{bur}}(\text{av.})$ [%] | <b>33.8</b> | <b>31.1</b> | <b>38.0</b> | <b>30.4</b> |

## Copies of the NMR spectra

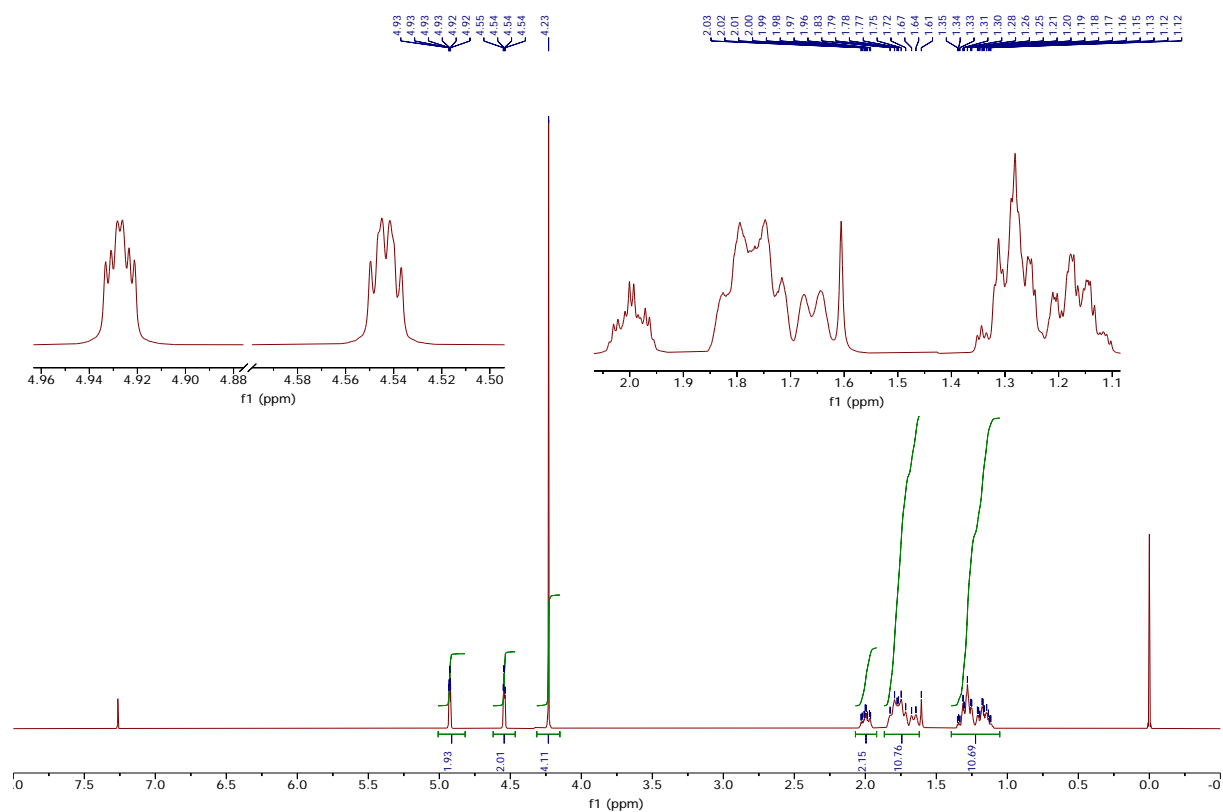

**Figure S7**  $^1\text{H}$  NMR spectrum (400 MHz,  $\text{CDCl}_3$ ) of **1b**

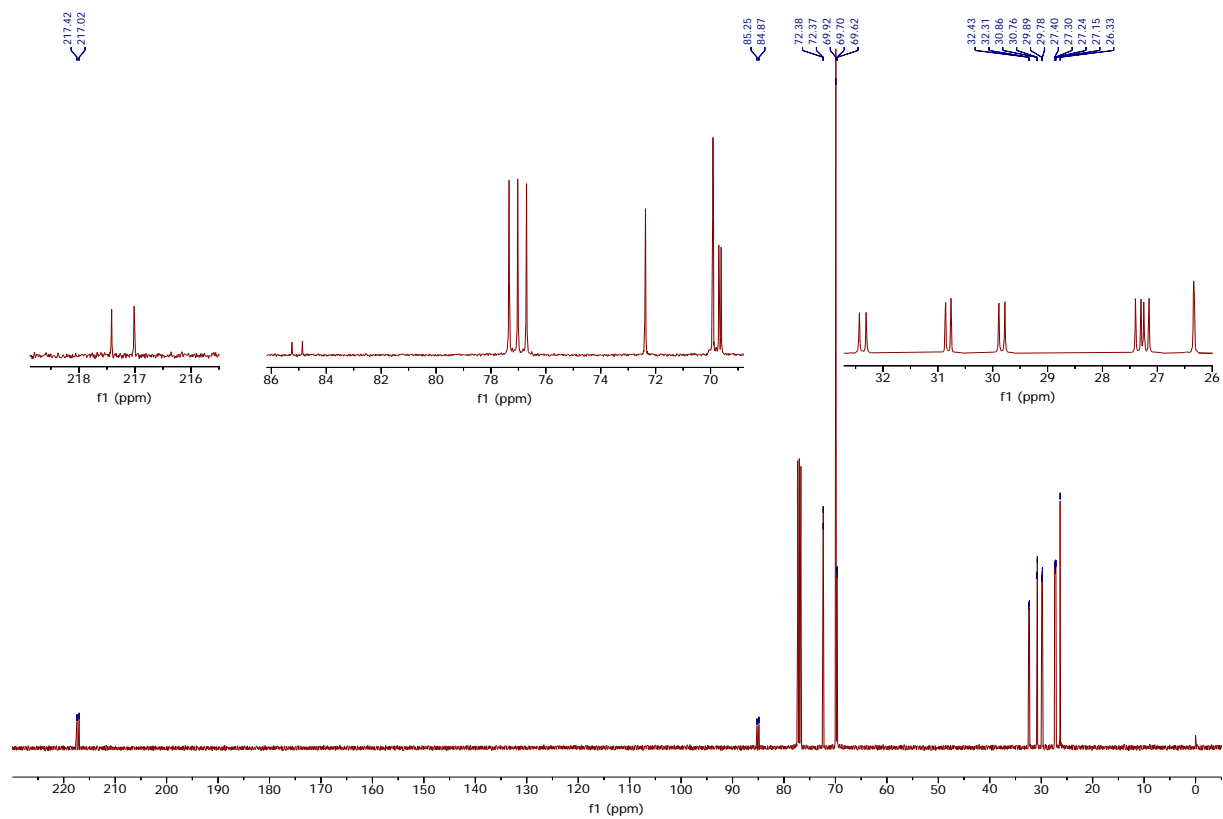

**Figure S8**  $^{13}\text{C}\{^1\text{H}\}$  NMR spectrum (101 MHz,  $\text{CDCl}_3$ ) of **1b**



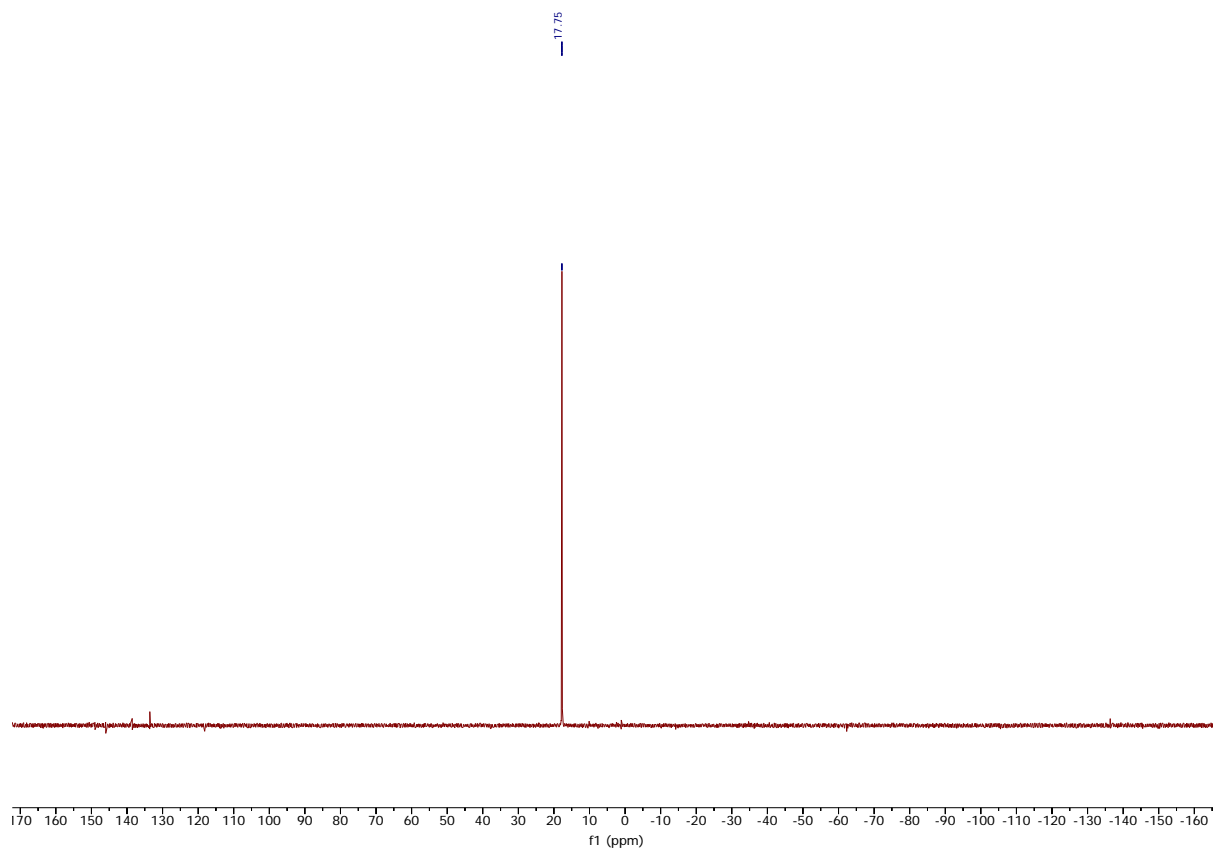

**Figure S9**  $^{31}\text{P}\{^1\text{H}\}$  NMR spectrum (162 MHz,  $\text{CDCl}_3$ ) of **1b**

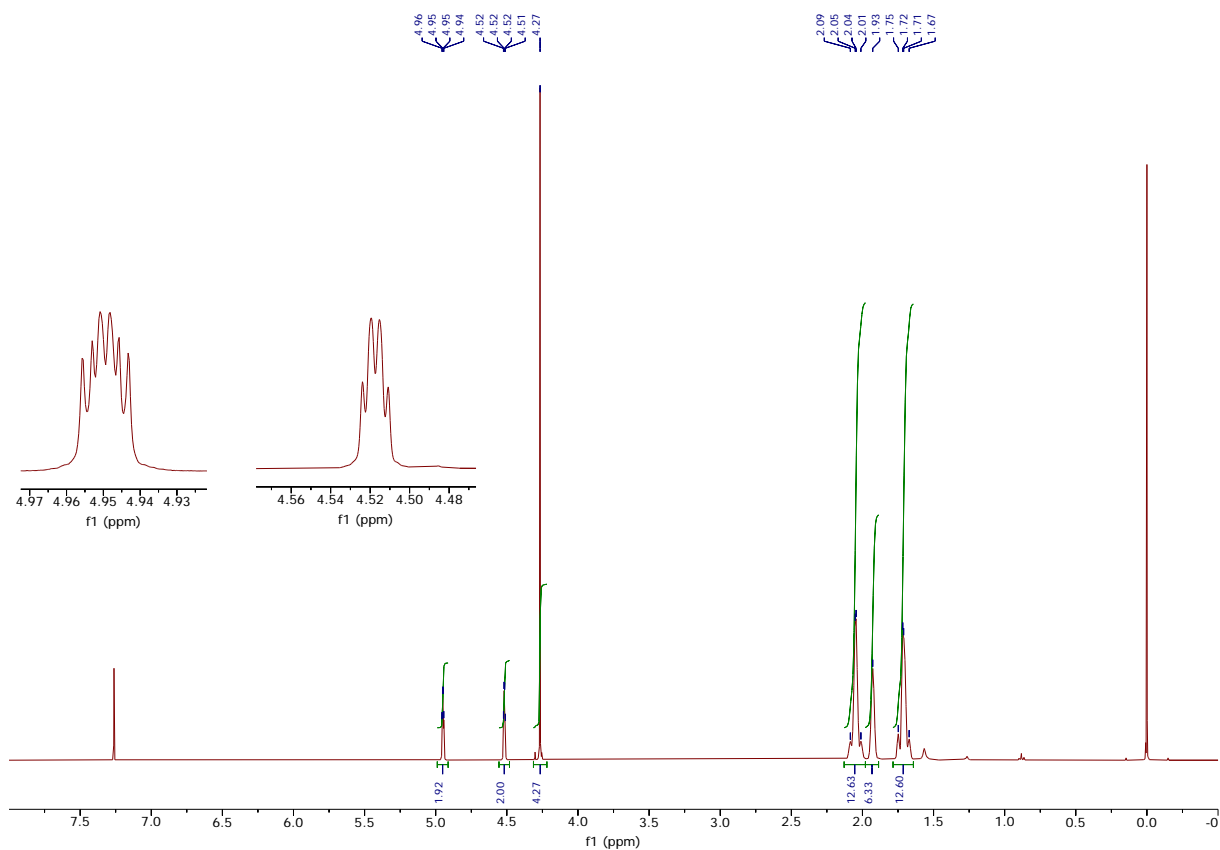

**Figure S10**  $^1\text{H}$  NMR spectrum (400 MHz,  $\text{CDCl}_3$ ) of **1c**

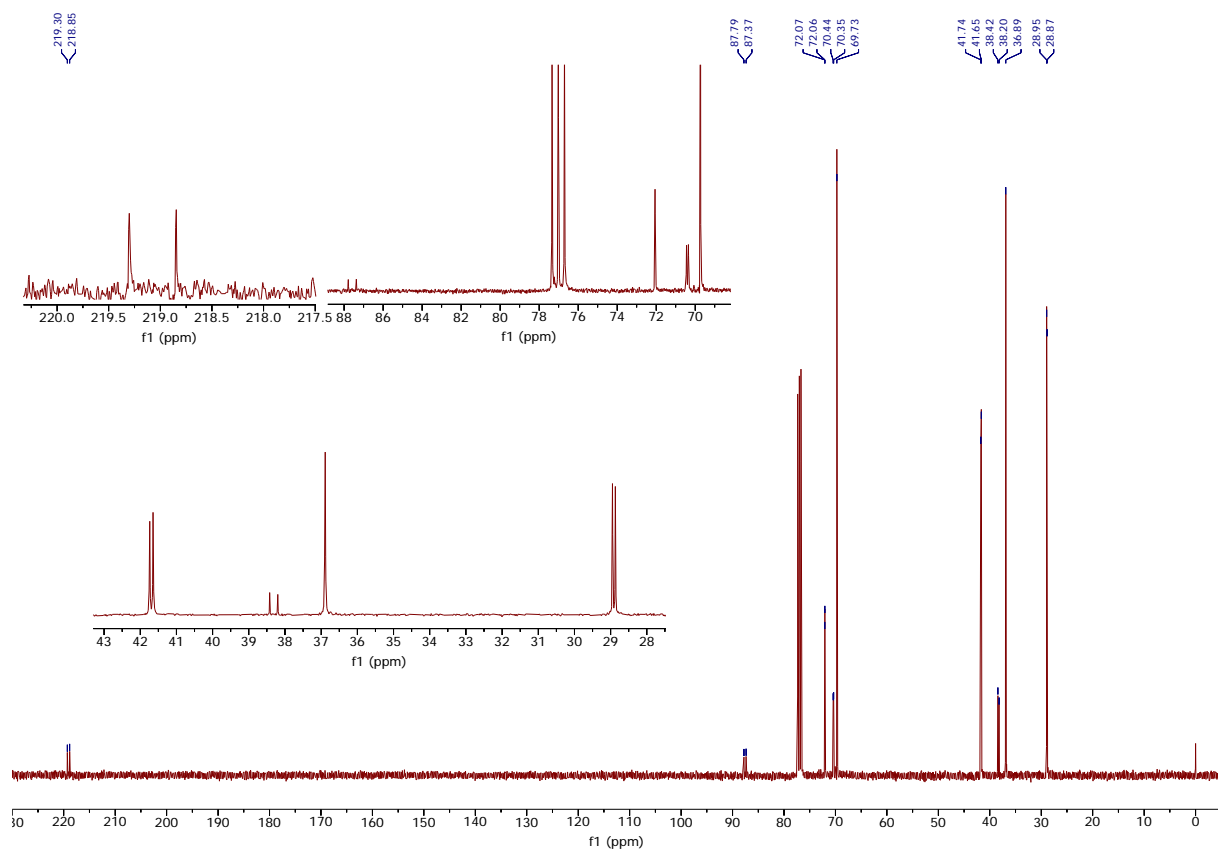

**Figure S11**  $^{13}\text{C}\{^1\text{H}\}$  NMR spectrum (101 MHz,  $\text{CDCl}_3$ ) of **1c**

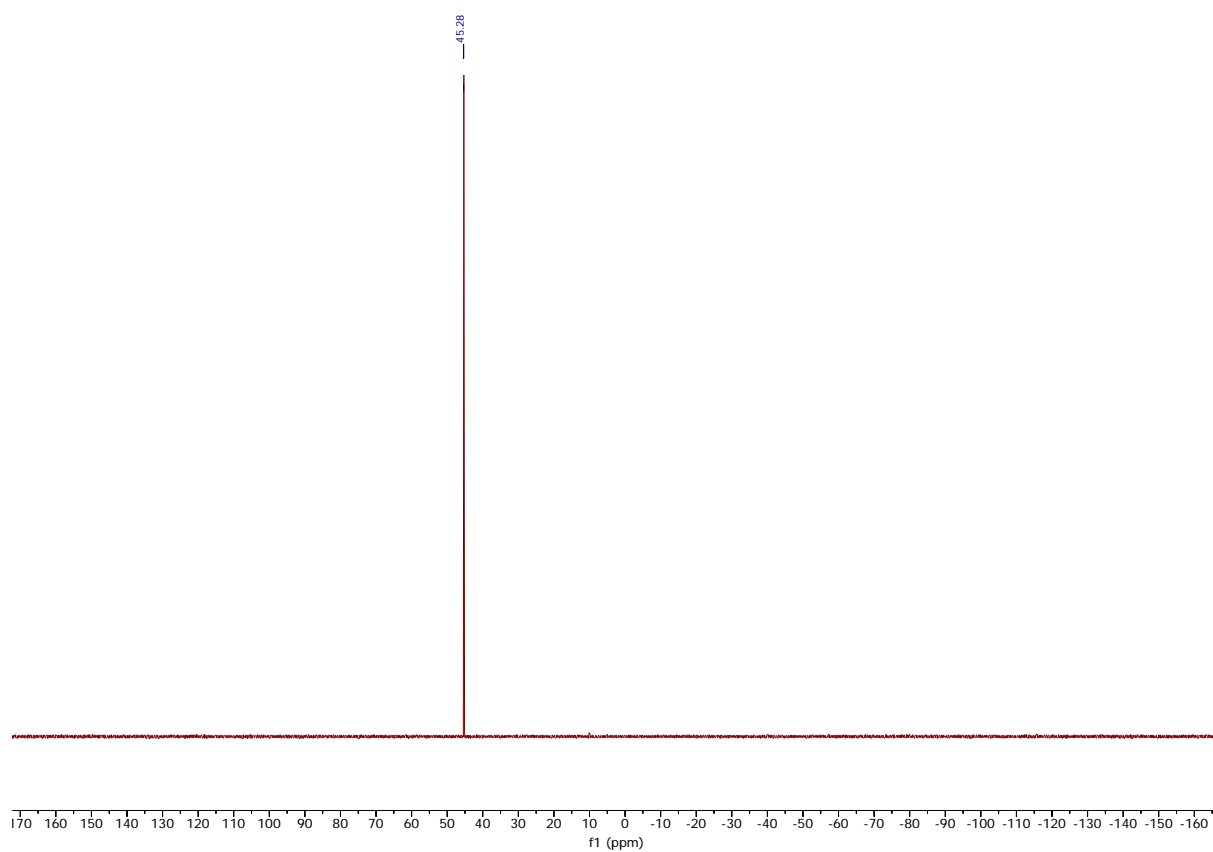

**Figure S12**  $^{31}\text{P}\{^1\text{H}\}$  NMR spectrum (162 MHz,  $\text{CDCl}_3$ ) of **1c**

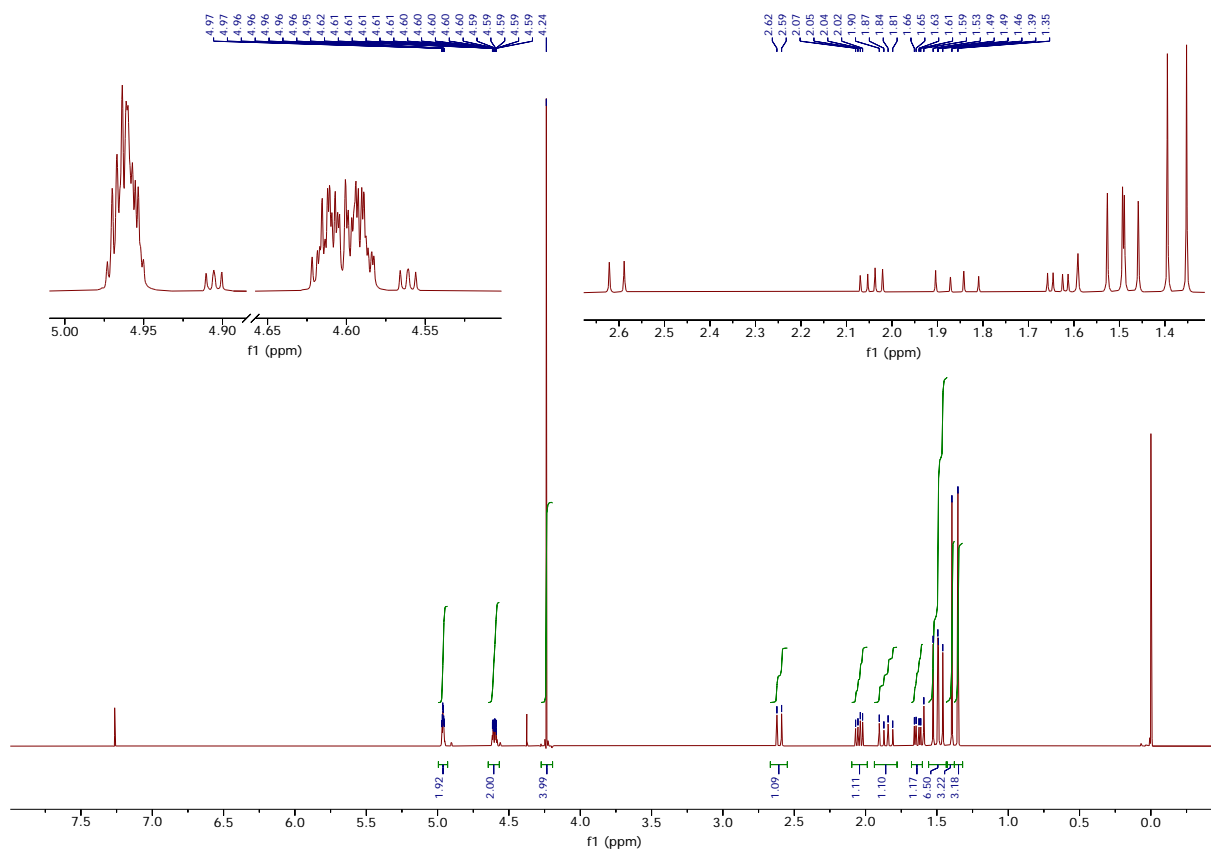

**Figure S13**  $^1\text{H}$  NMR spectrum (400 MHz,  $\text{CDCl}_3$ ) of **1d**

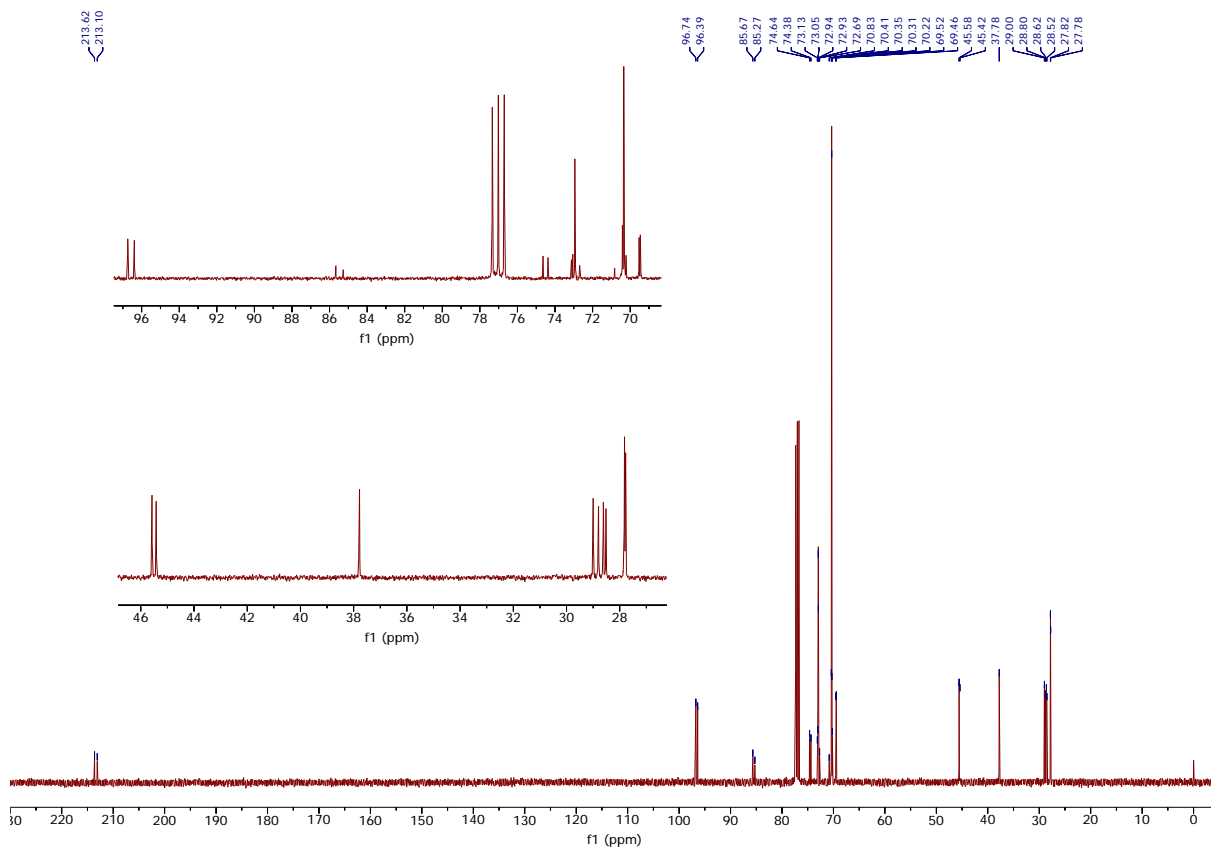

**Figure S14**  $^{13}\text{C}\{^1\text{H}\}$  NMR spectrum (101 MHz,  $\text{CDCl}_3$ ) of **1d**

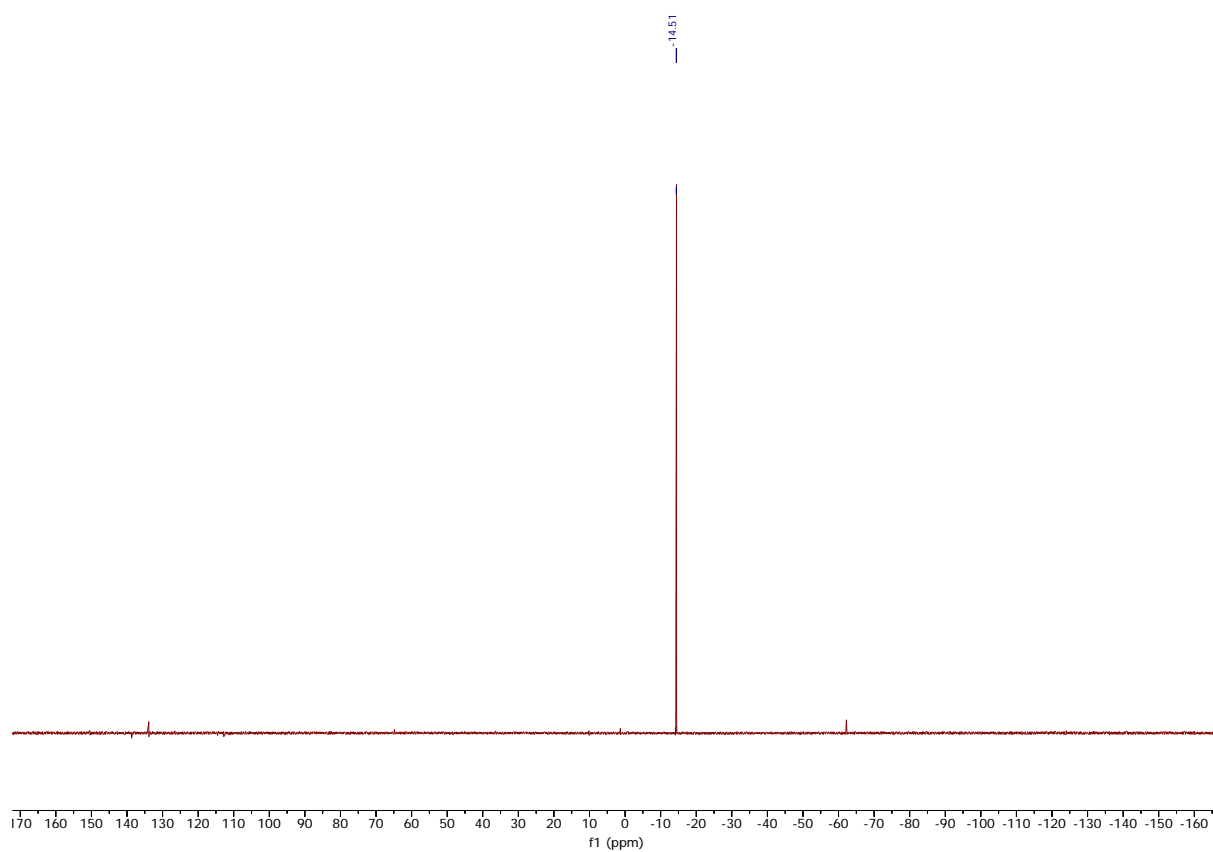

**Figure S15**  $^{31}\text{P}\{^1\text{H}\}$  NMR spectrum (162 MHz,  $\text{CDCl}_3$ ) of **1d**

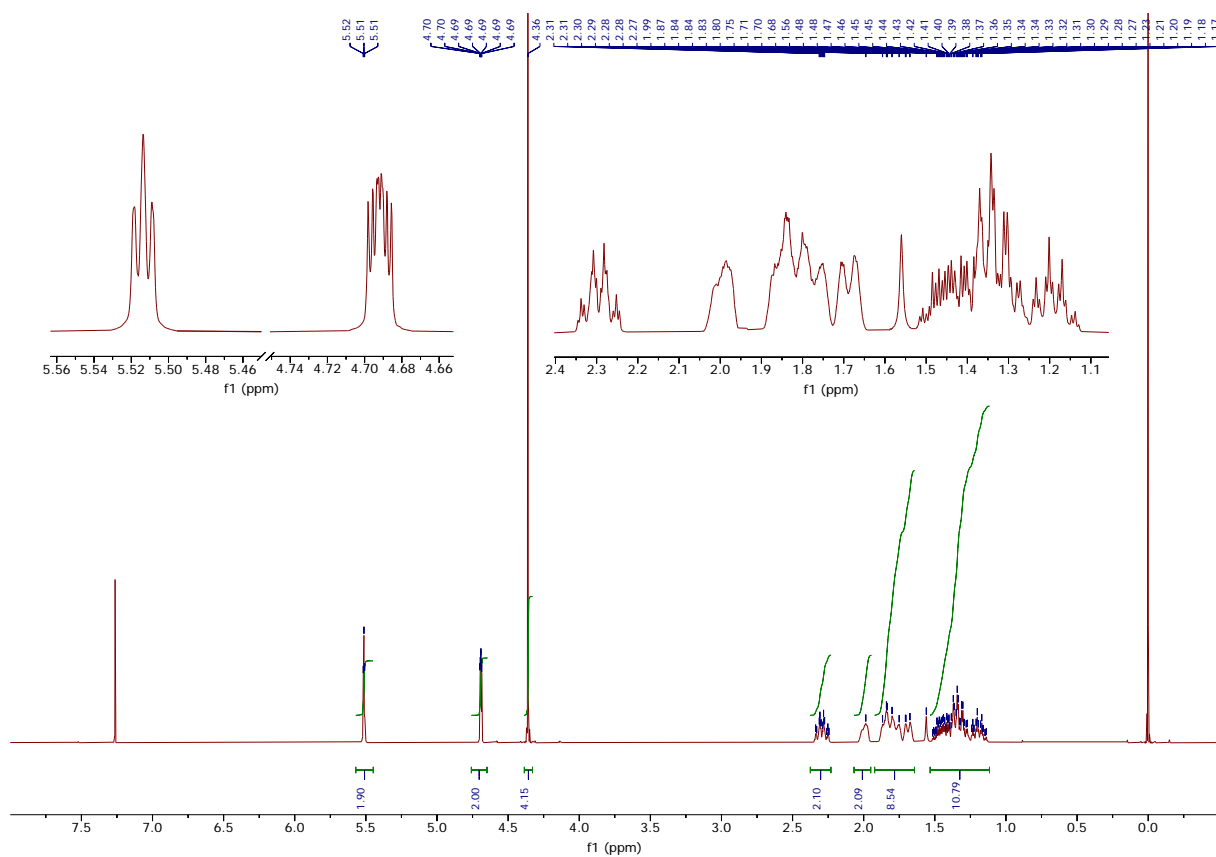

**Figure S16**  $^1\text{H}$  NMR spectrum (400 MHz,  $\text{CDCl}_3$ ) of **2b**

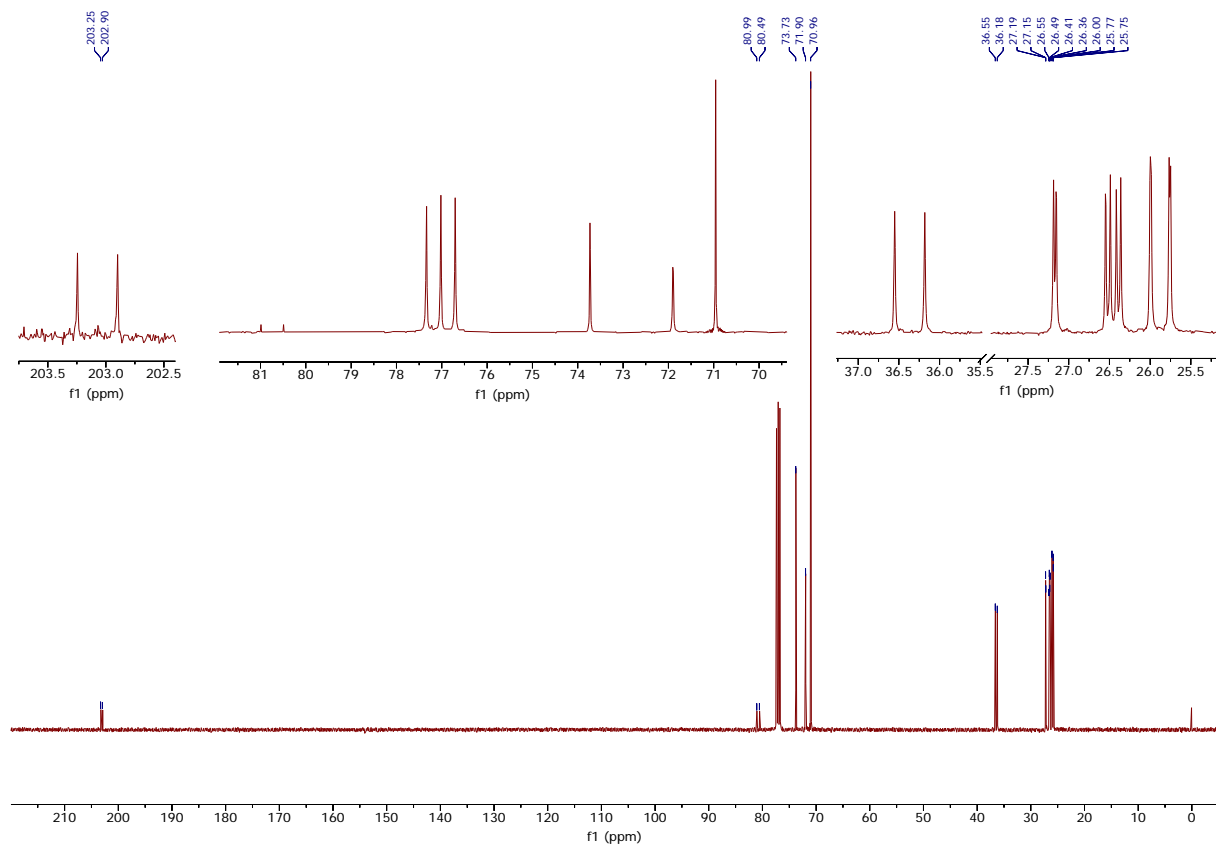

**Figure S17**  $^{13}\text{C}\{^1\text{H}\}$  NMR spectrum (101 MHz,  $\text{CDCl}_3$ ) of **2b**

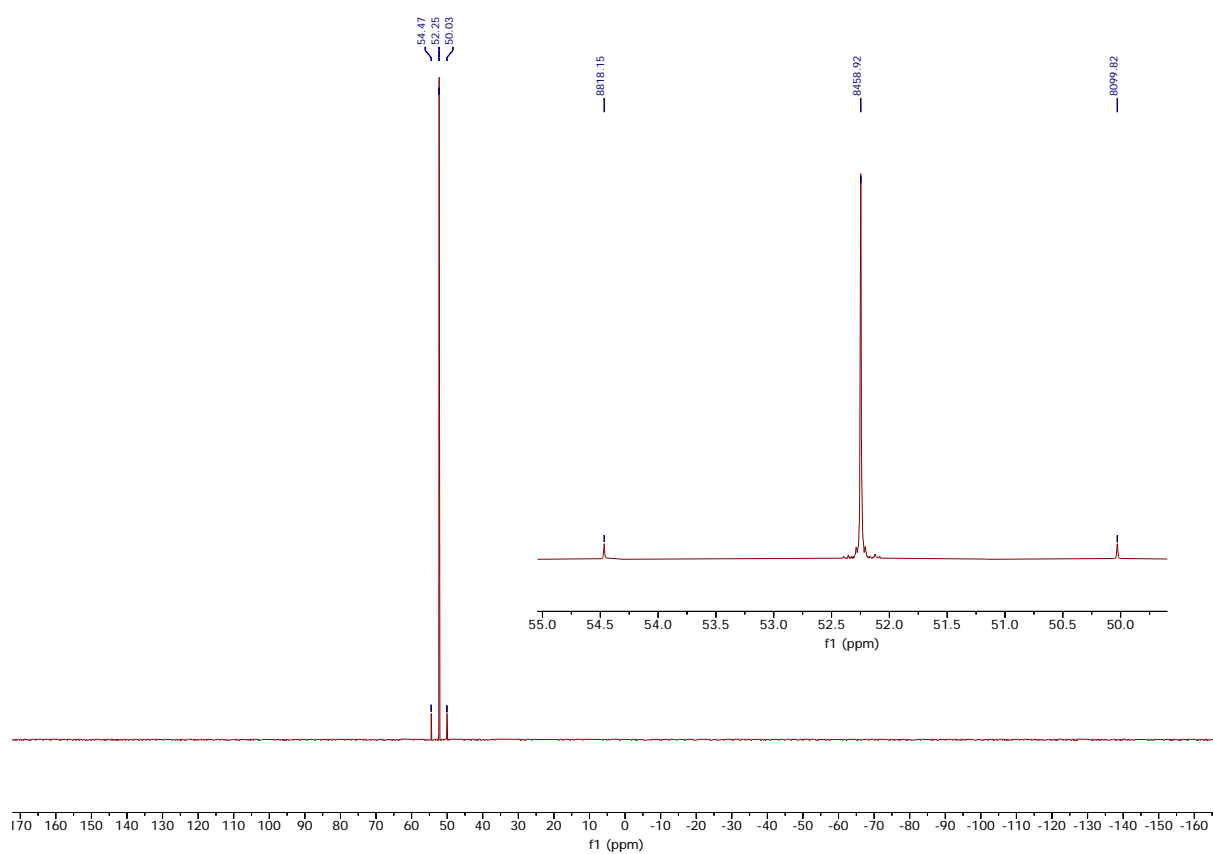

**Figure S18**  $^{31}\text{P}\{^1\text{H}\}$  NMR spectrum (162 MHz,  $\text{CDCl}_3$ ) of **2b**

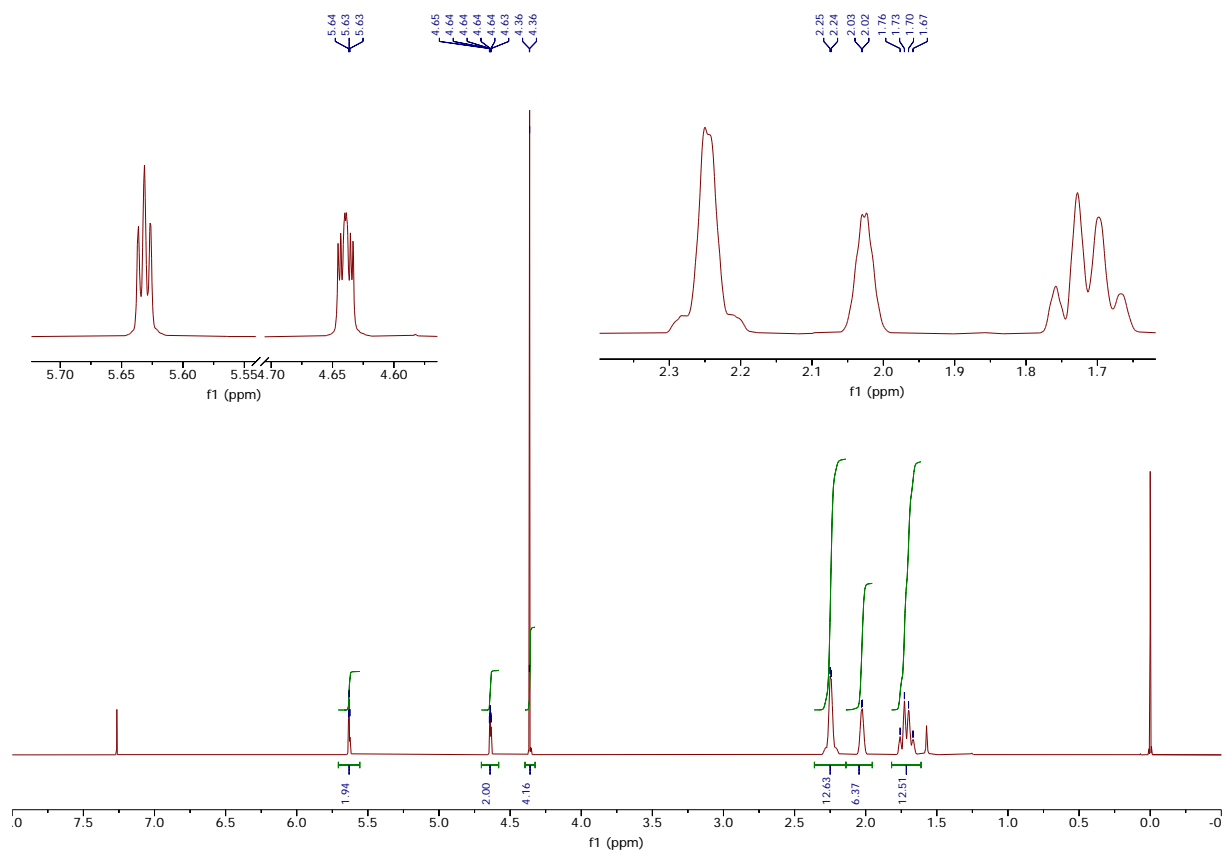

**Figure S19**  $^1\text{H}$  NMR spectrum (400 MHz,  $\text{CDCl}_3$ ) of **2c**

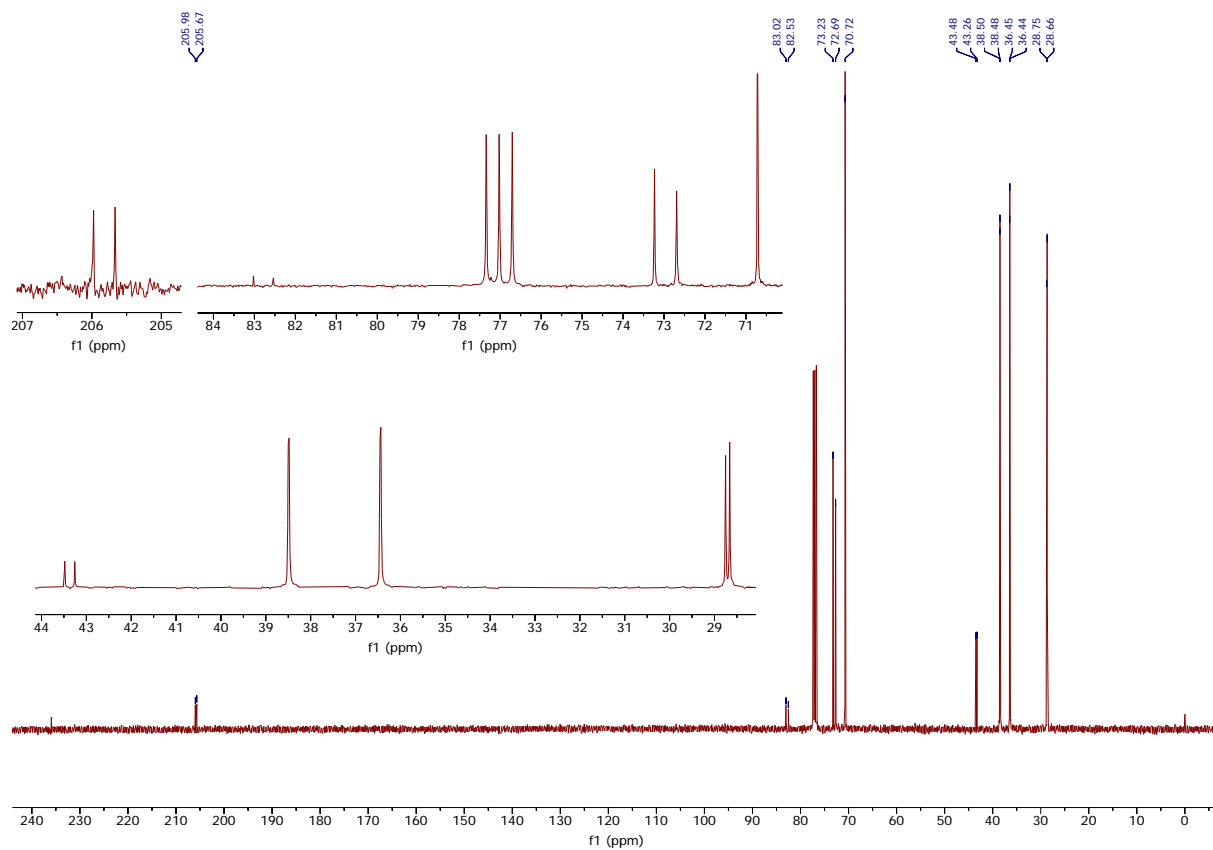

**Figure S20**  $^{13}\text{C}\{^1\text{H}\}$  NMR spectrum (101 MHz,  $\text{CDCl}_3$ ) of **2c**



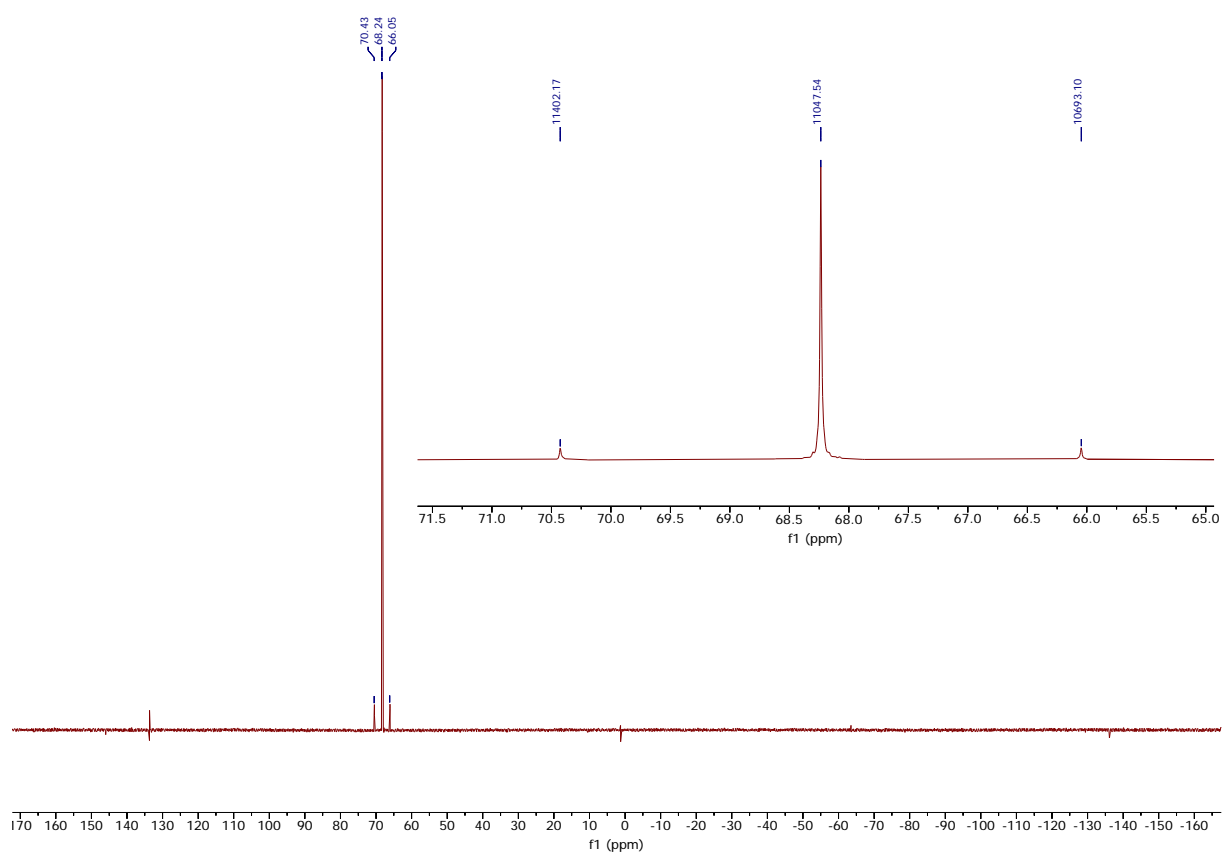

**Figure S21**  $^{31}\text{P}\{^1\text{H}\}$  NMR spectrum (162 MHz,  $\text{CDCl}_3$ ) of **2c**

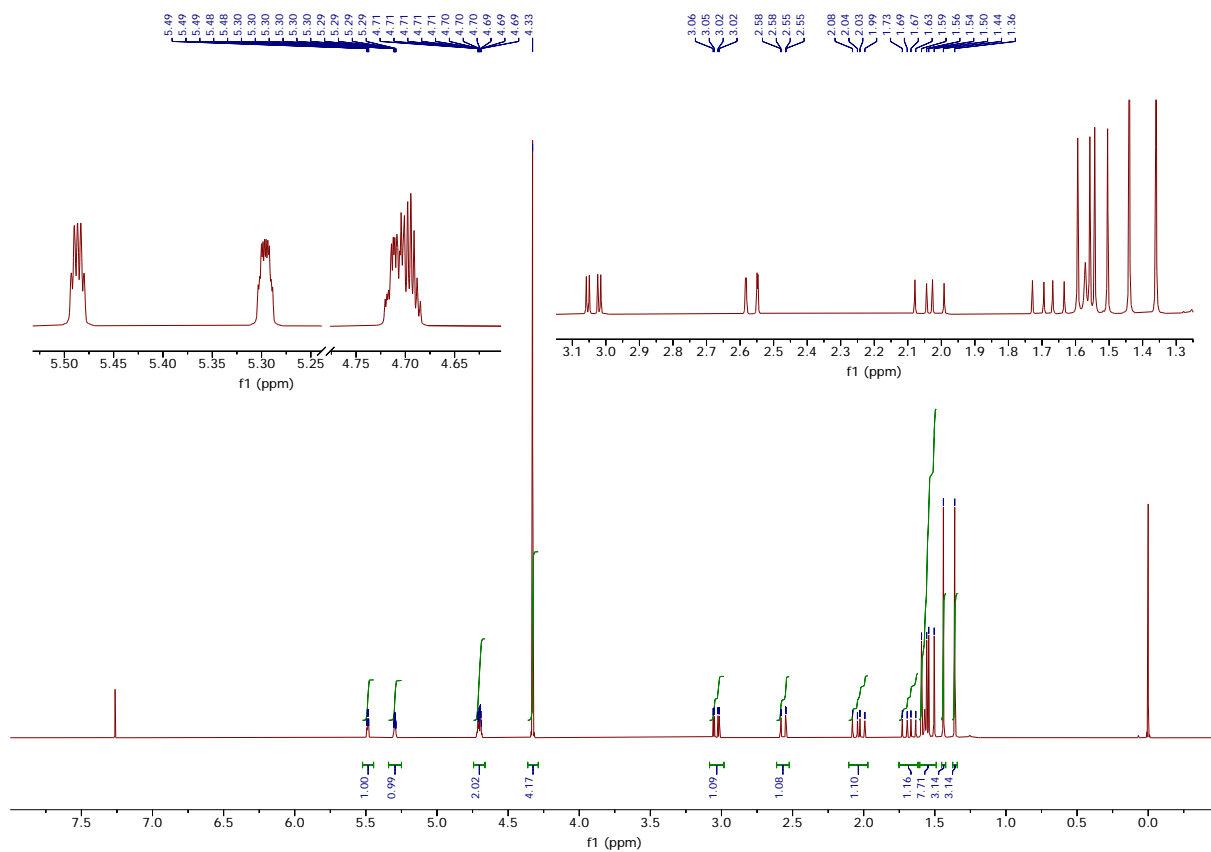

**Figure S22**  $^1\text{H}$  NMR spectrum (400 MHz,  $\text{CDCl}_3$ ) of **2d**

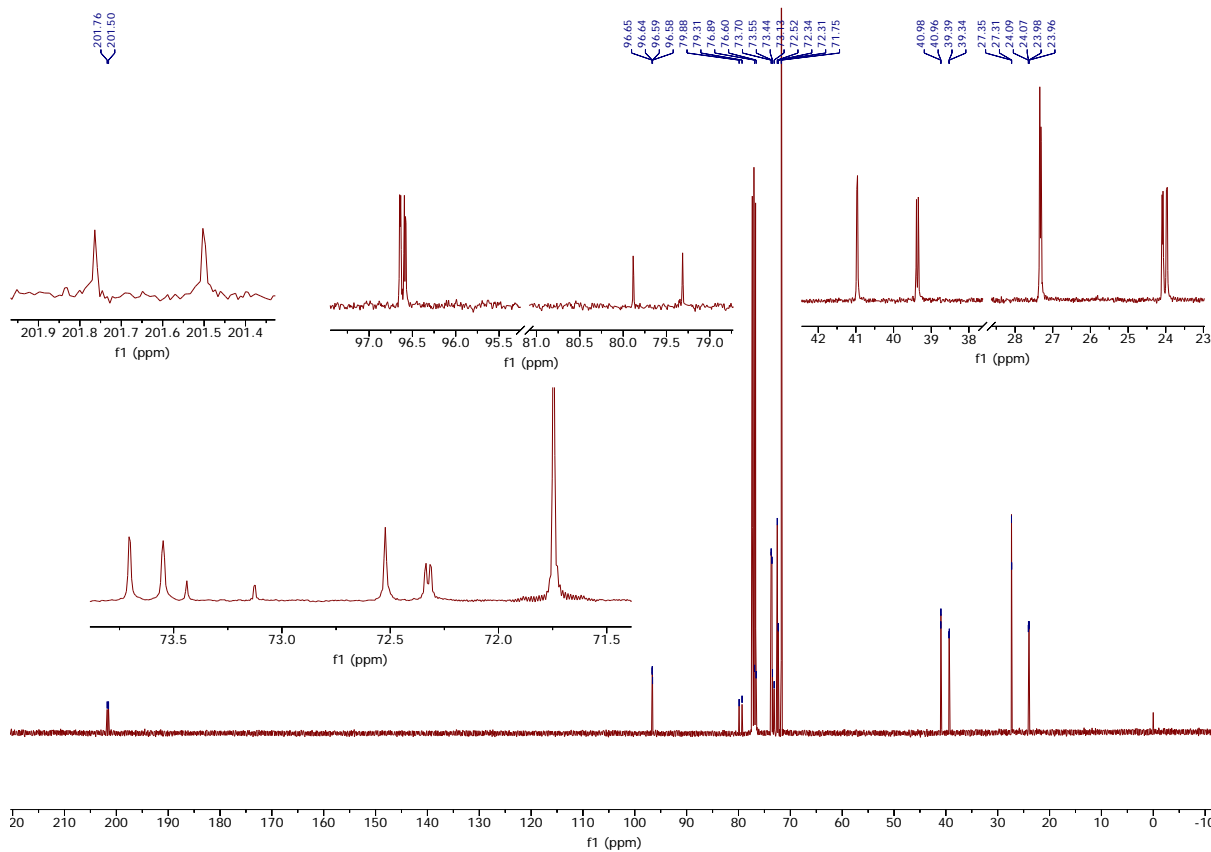

**Figure S23**  $^{13}\text{C}\{^1\text{H}\}$  NMR spectrum (101 MHz,  $\text{CDCl}_3$ ) of **2d**

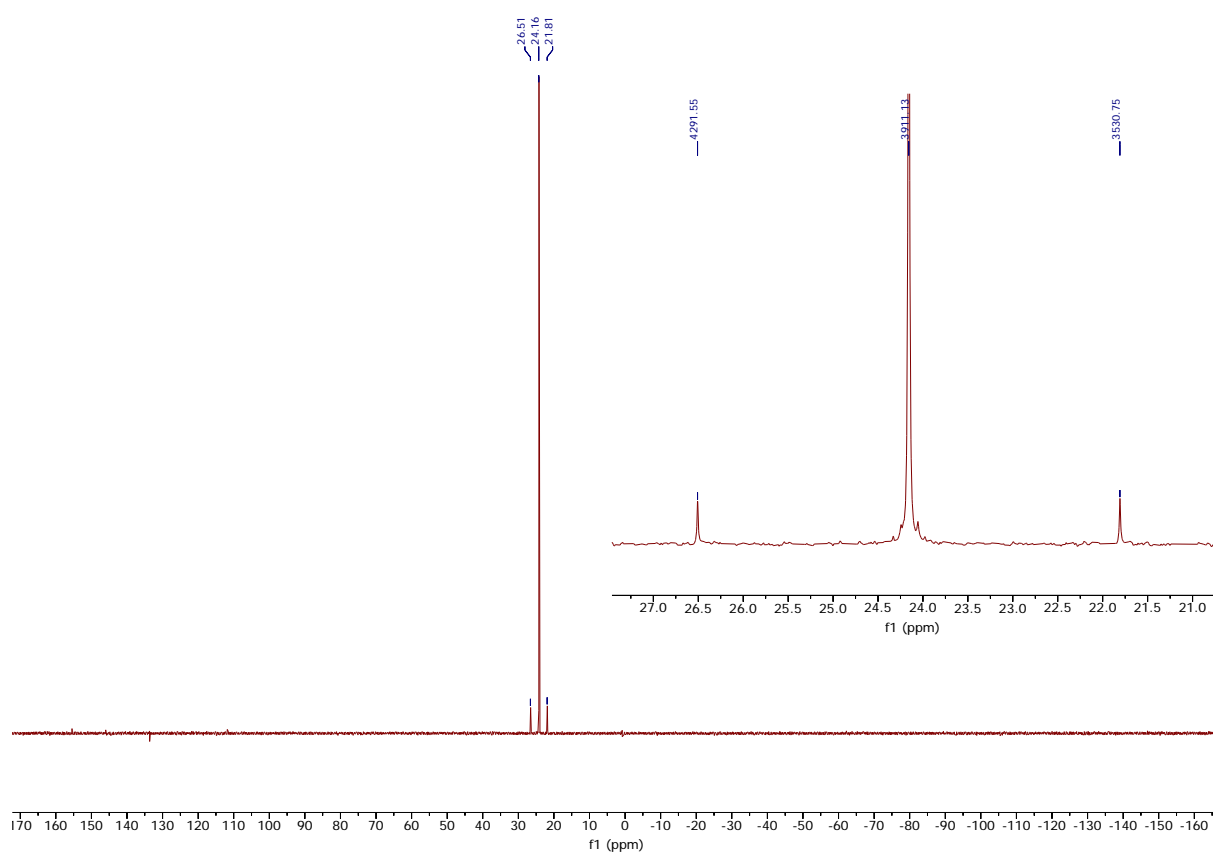

**Figure S24**  $^{31}\text{P}\{^1\text{H}\}$  NMR spectrum (162 MHz,  $\text{CDCl}_3$ ) of **2d**

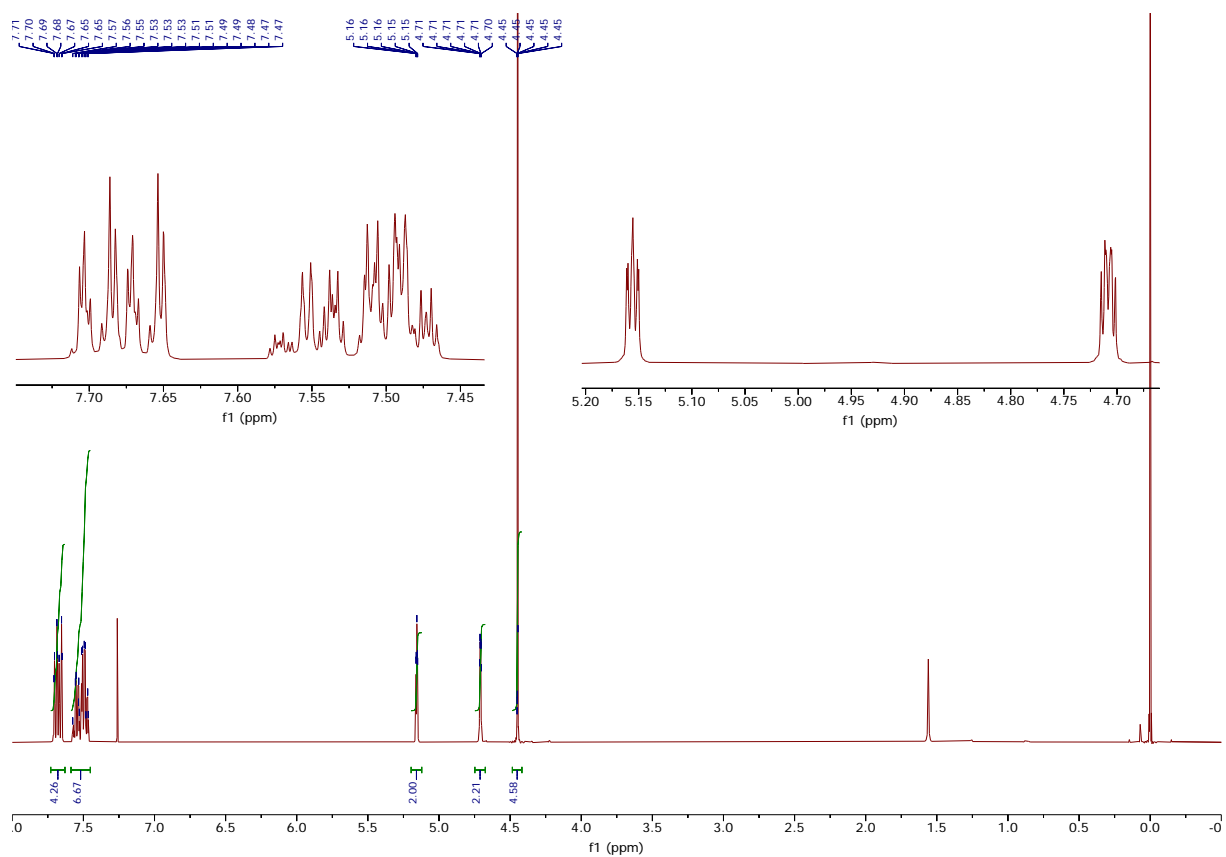

**Figure S25**  $^1\text{H}$  NMR spectrum (400 MHz,  $\text{CDCl}_3$ ) of **3a**

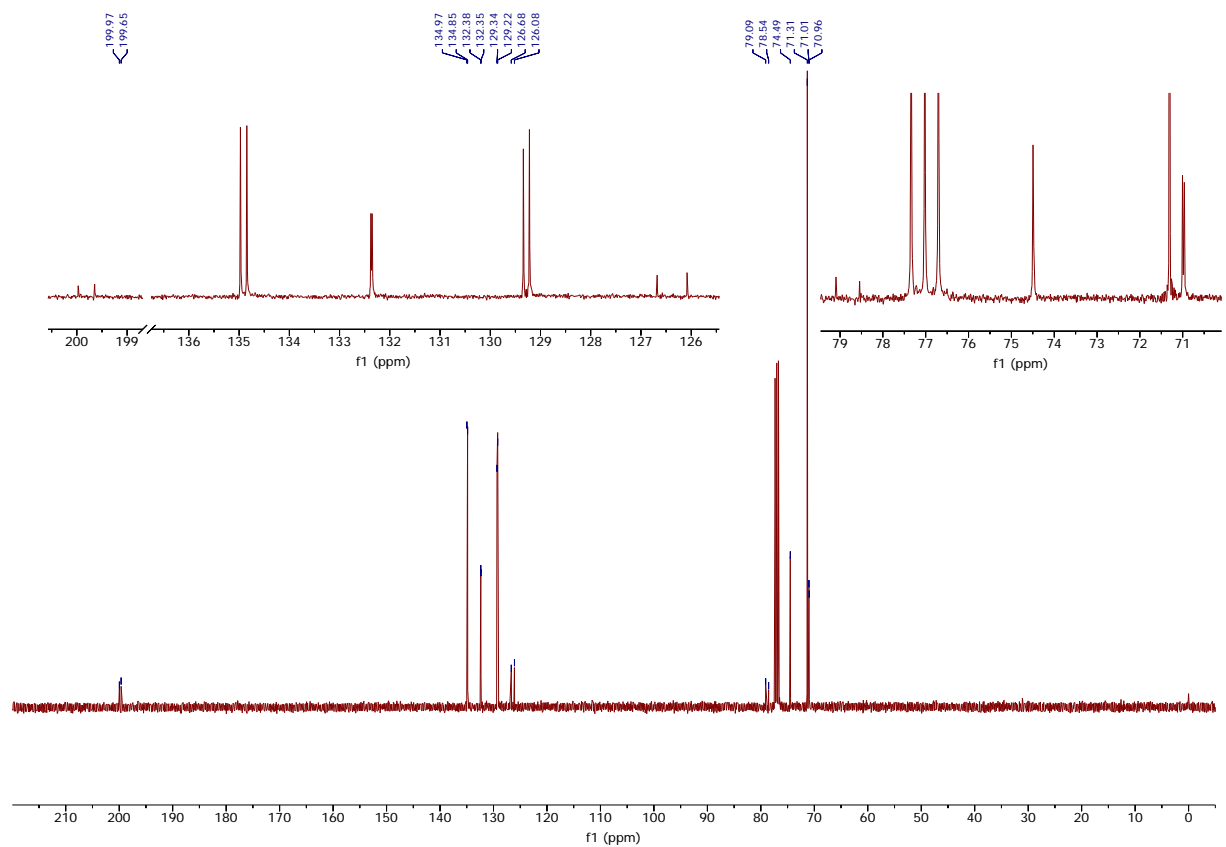

**Figure S26**  $^{13}\text{C}\{^1\text{H}\}$  NMR spectrum (101 MHz,  $\text{CDCl}_3$ ) of **3a**

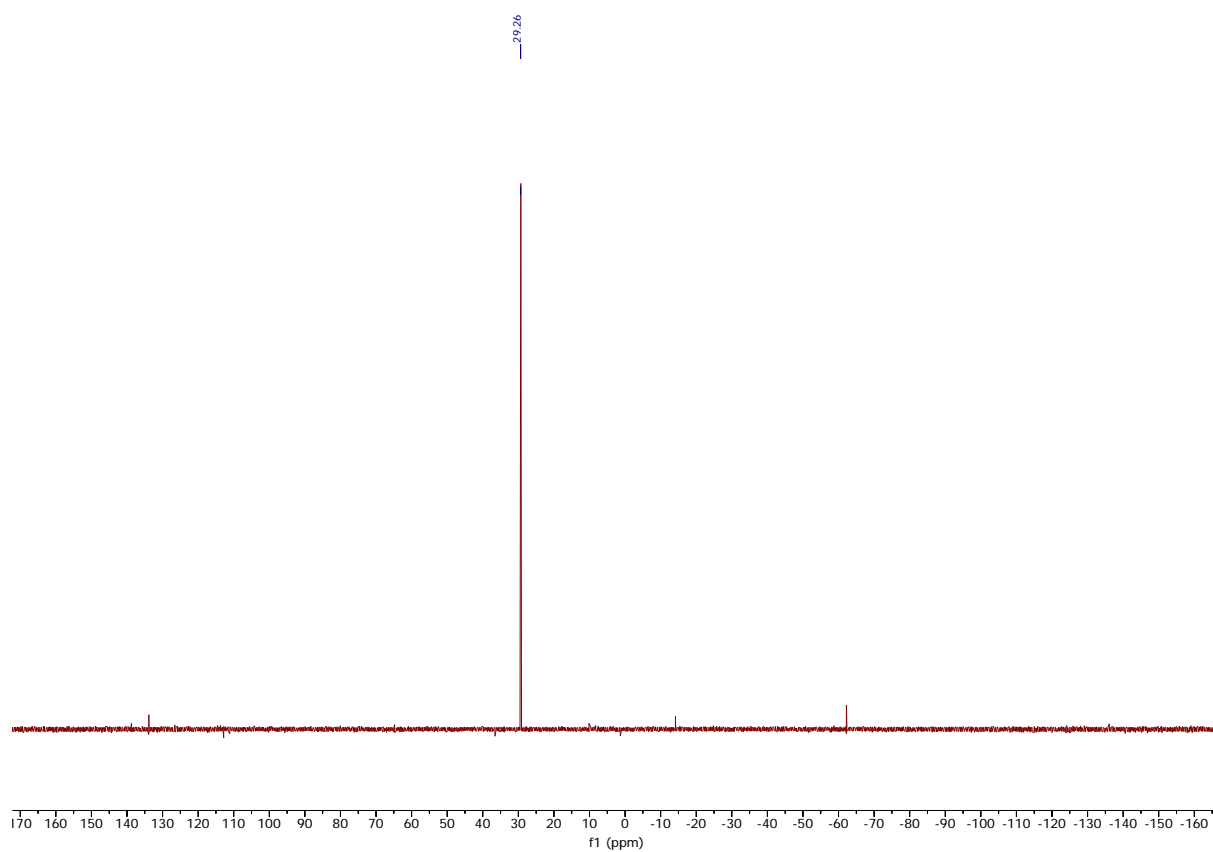

**Figure S27**  $^{31}\text{P}\{^1\text{H}\}$  NMR spectrum (162 MHz,  $\text{CDCl}_3$ ) of **3a**

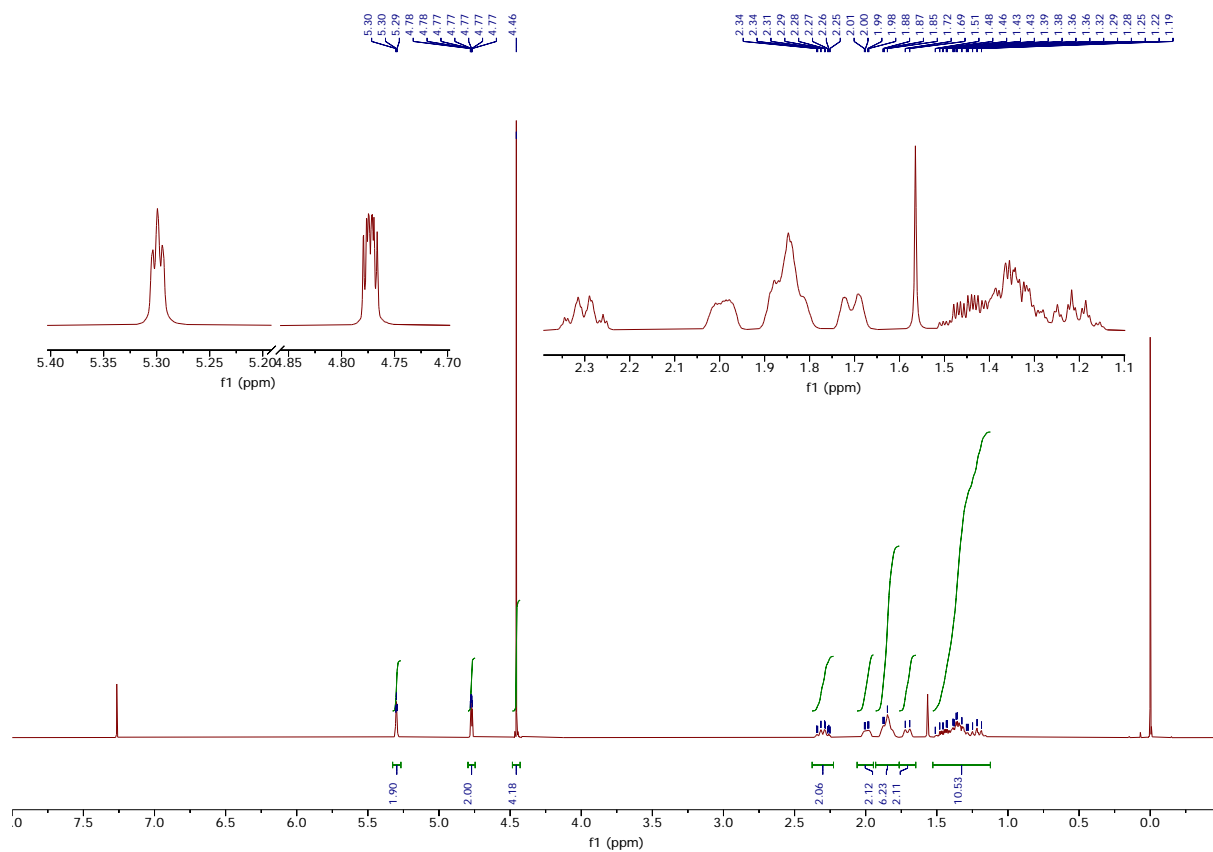

**Figure S28**  $^1\text{H}$  NMR spectrum (400 MHz,  $\text{CDCl}_3$ ) of **3b**

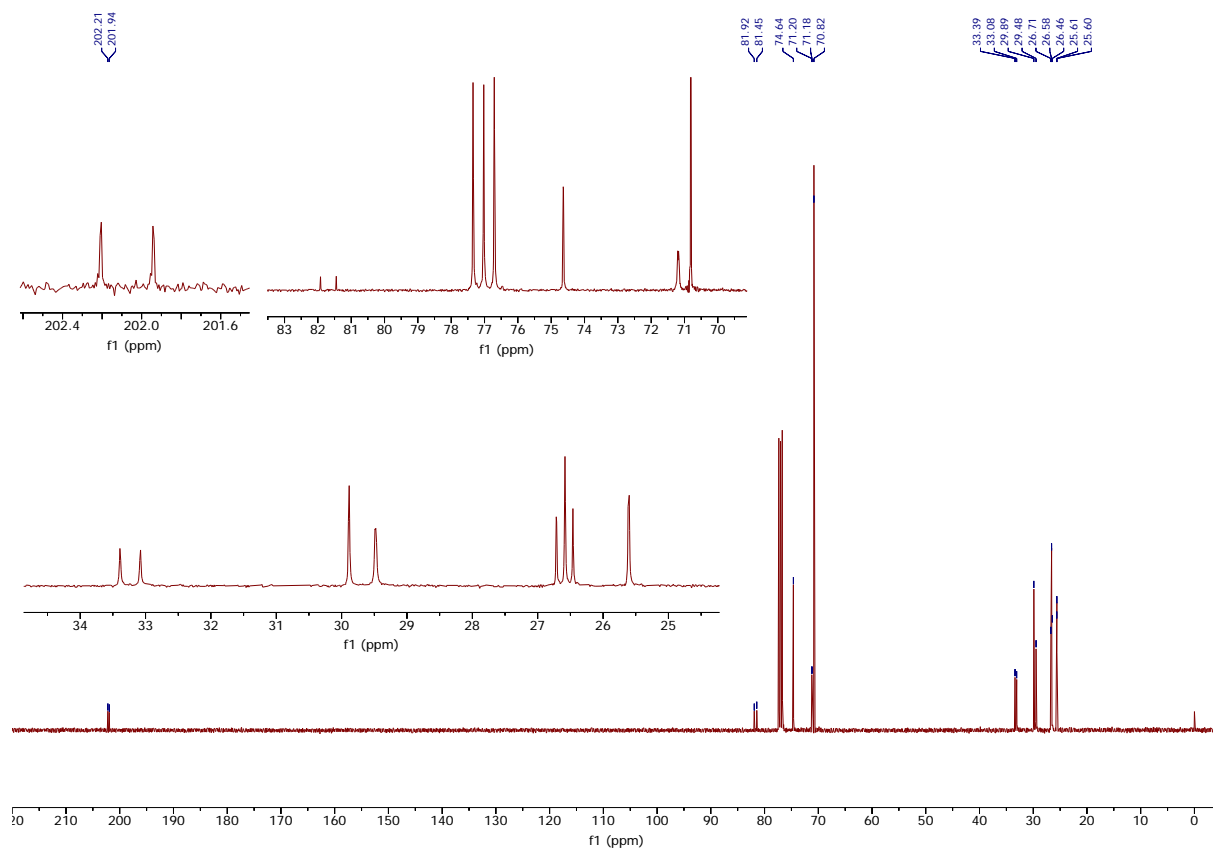

**Figure S29**  $^{13}\text{C}\{^1\text{H}\}$  NMR spectrum (101 MHz,  $\text{CDCl}_3$ ) of **3b**

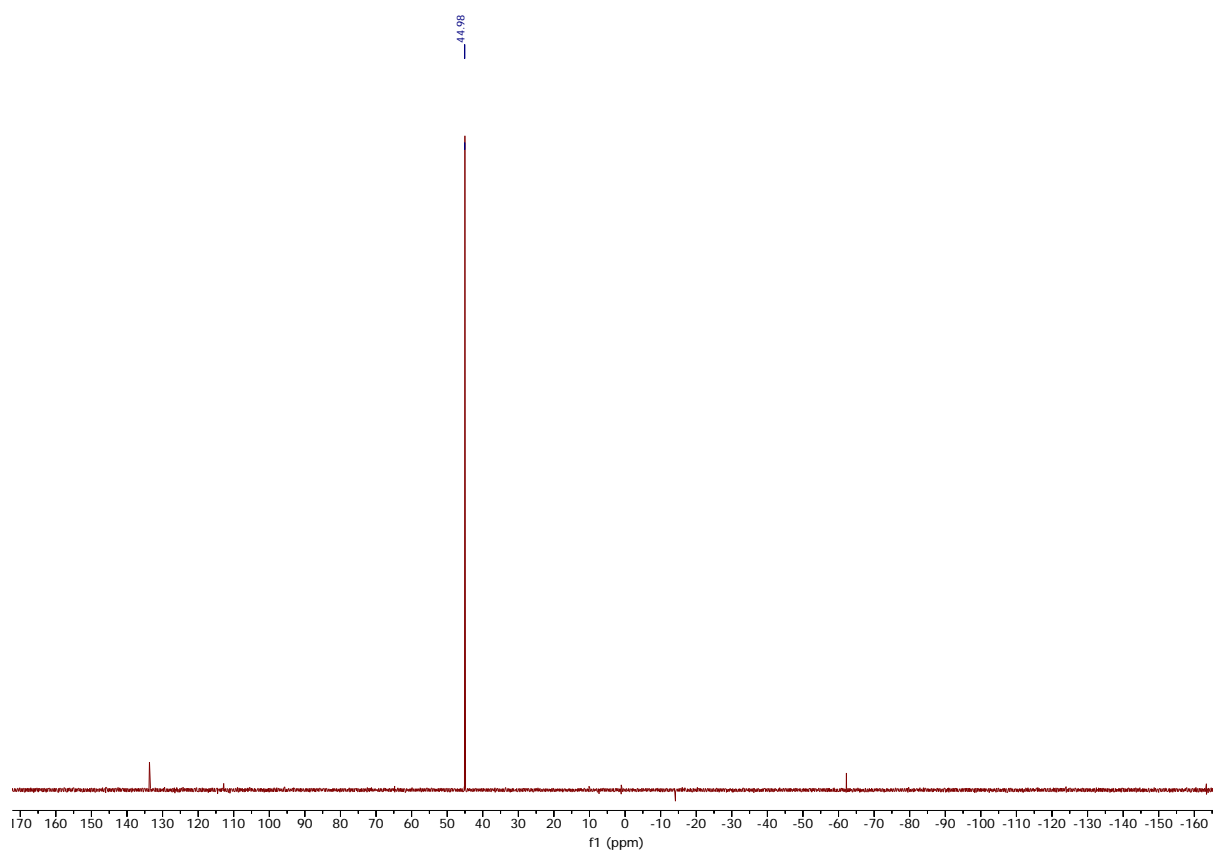

**Figure S30**  $^{31}\text{P}\{^1\text{H}\}$  NMR spectrum (162 MHz,  $\text{CDCl}_3$ ) of **3b**

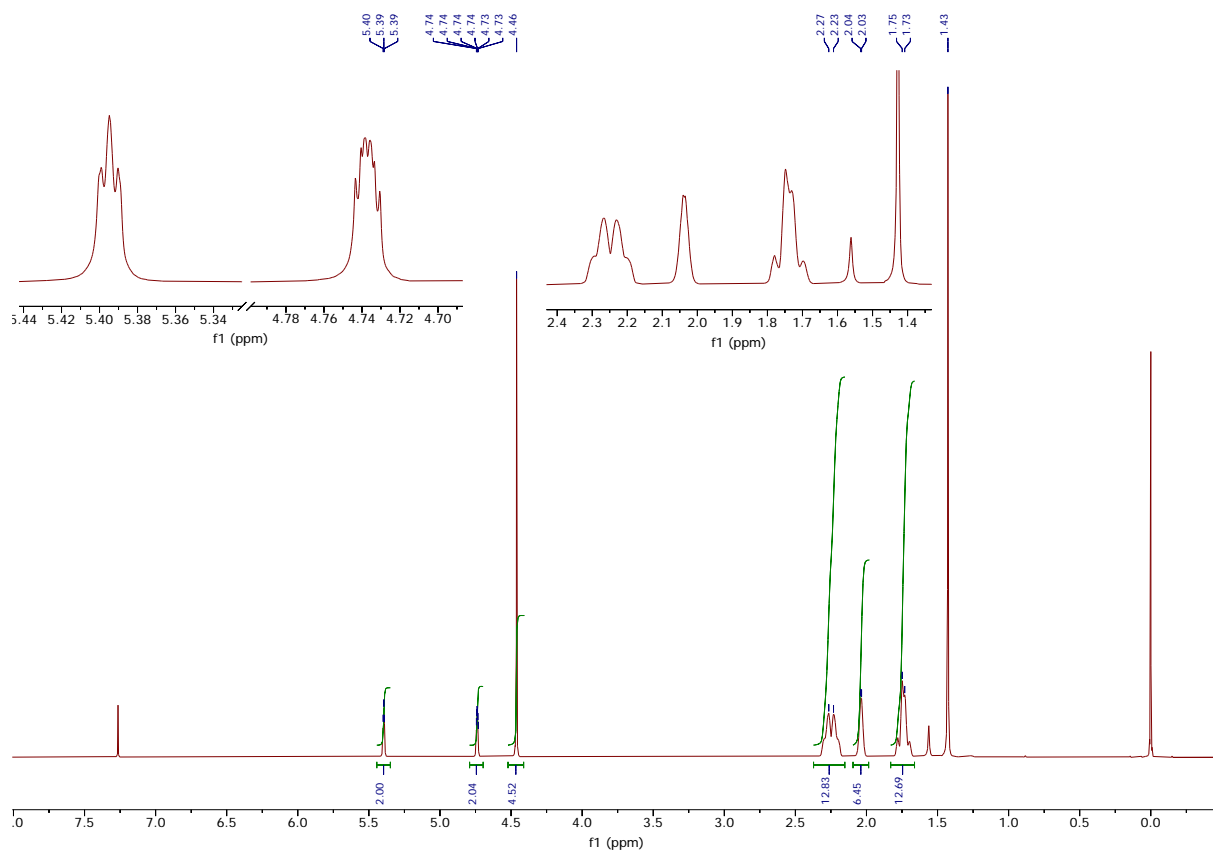

**Figure S31**  $^1\text{H}$  NMR spectrum (400 MHz,  $\text{CDCl}_3$ ) of **3c**

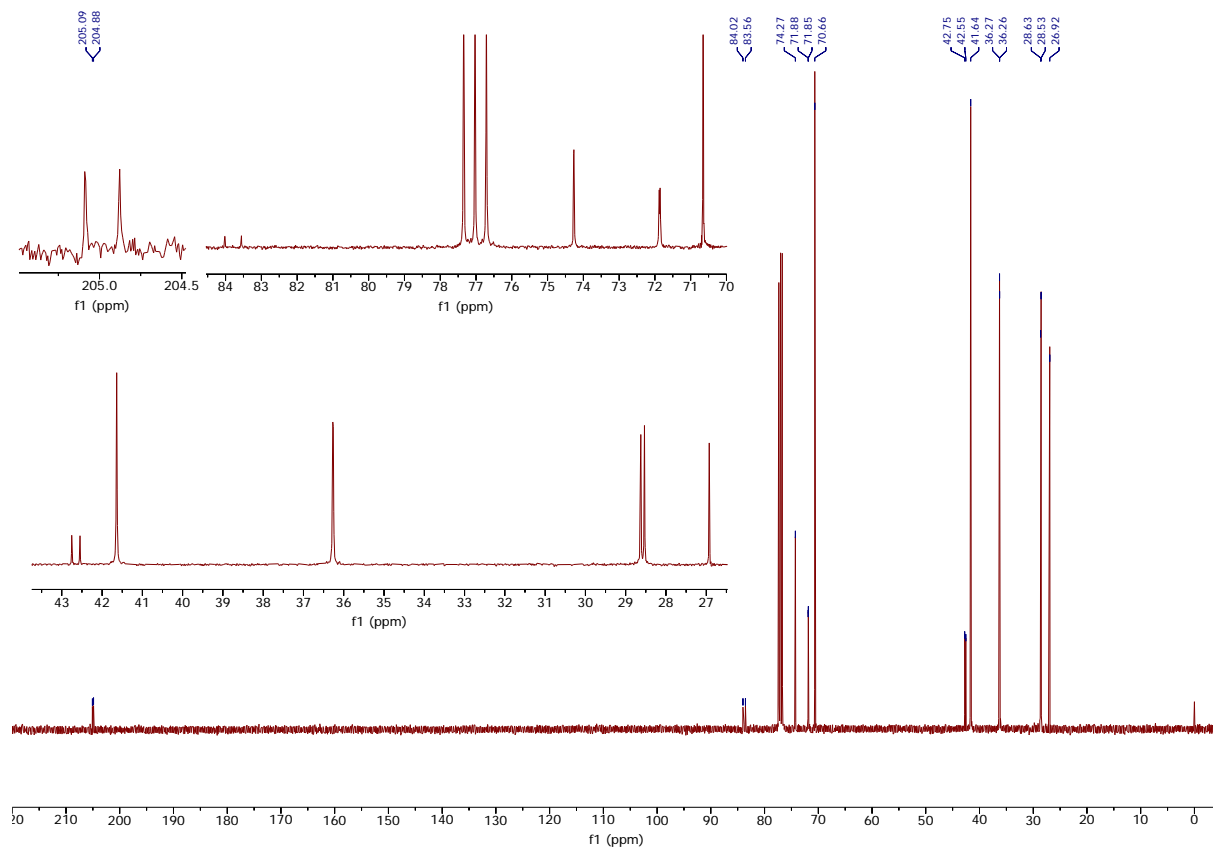

**Figure S32**  $^{13}\text{C}\{^1\text{H}\}$  NMR spectrum (101 MHz,  $\text{CDCl}_3$ ) of **3c**



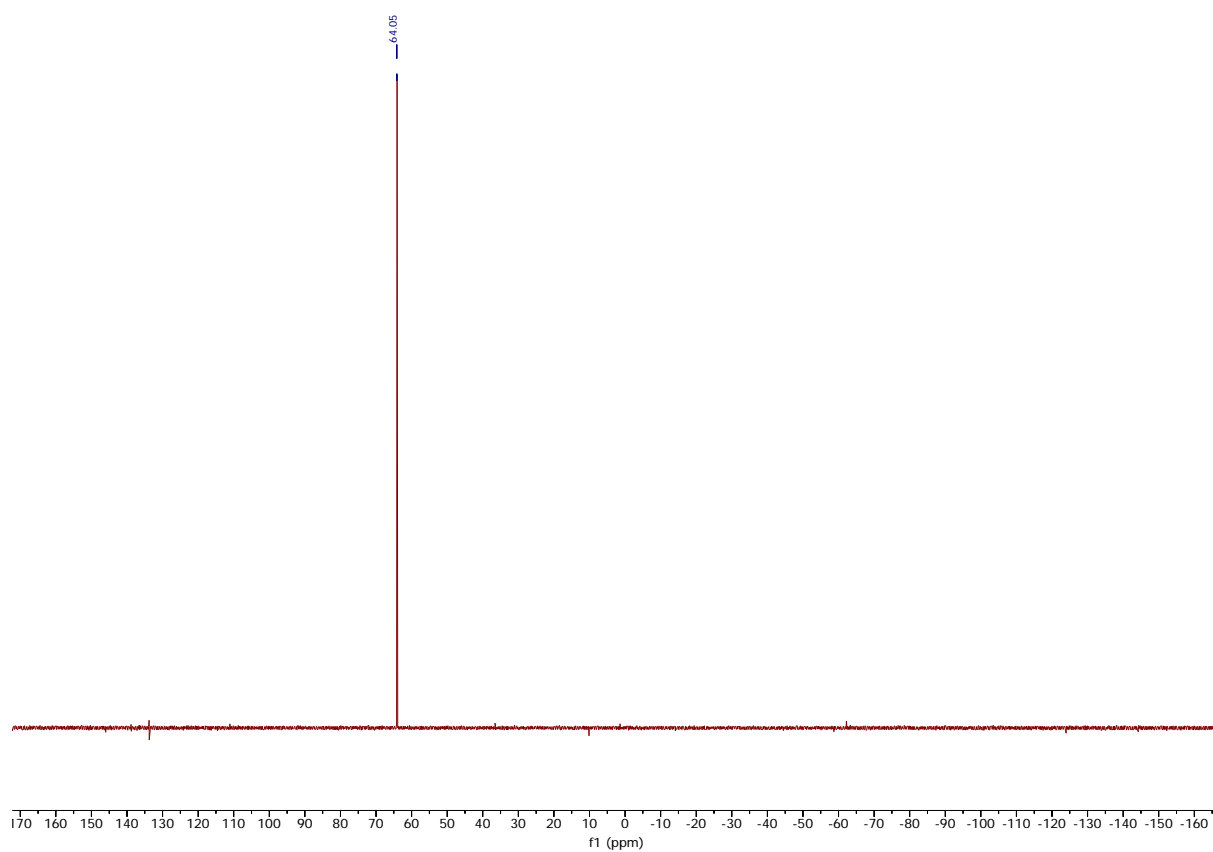

**Figure S33**  $^{31}\text{P}\{^1\text{H}\}$  NMR spectrum (162 MHz,  $\text{CDCl}_3$ ) of **3c**

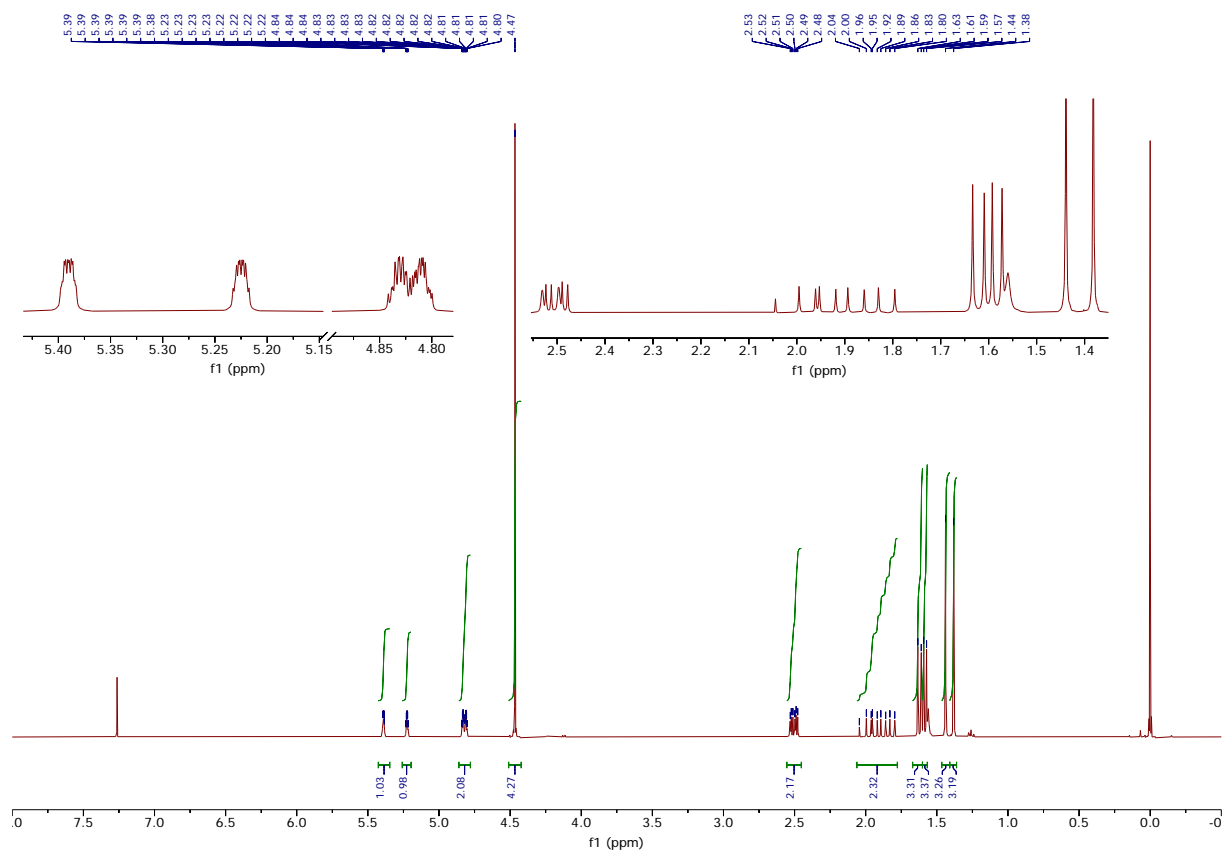

**Figure S34**  $^1\text{H}$  NMR spectrum (400 MHz,  $\text{CDCl}_3$ ) of **3d**

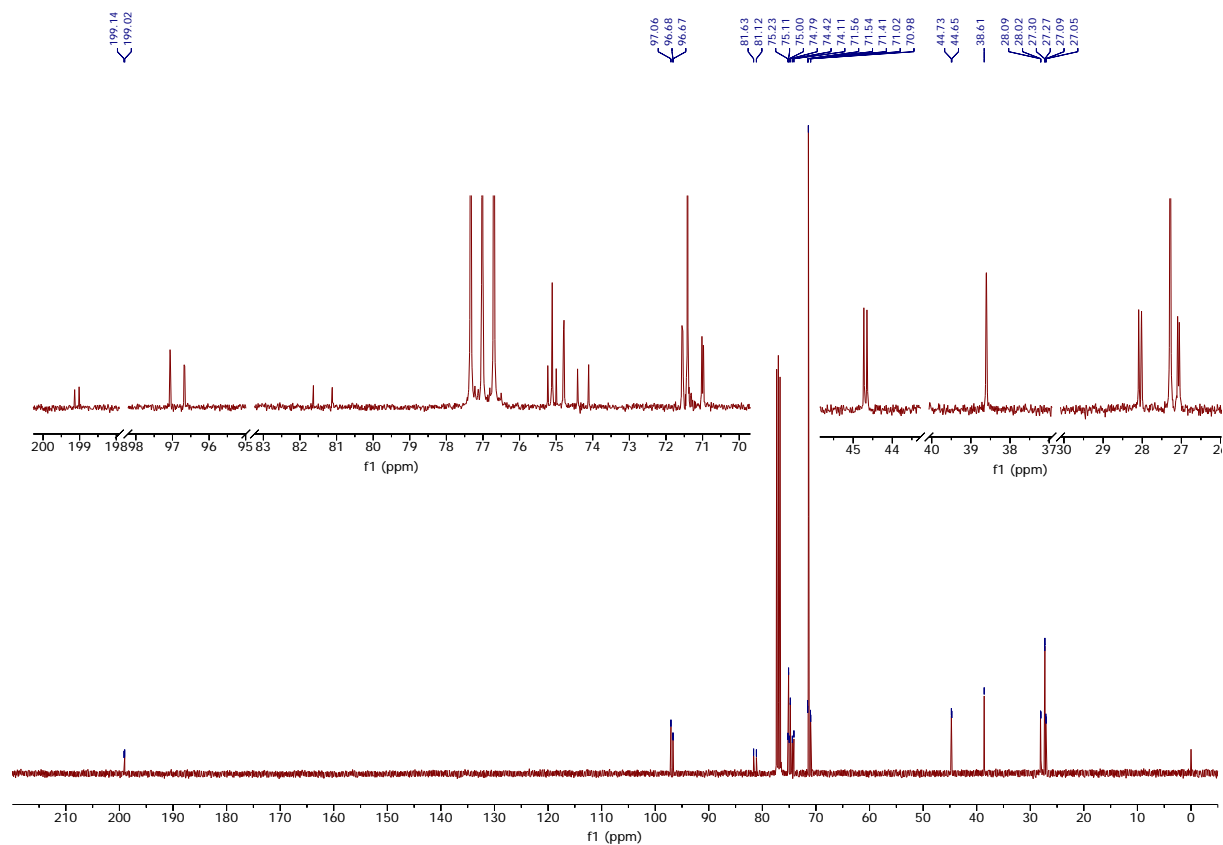

**Figure S35**  $^{13}\text{C}\{^1\text{H}\}$  NMR spectrum (101 MHz,  $\text{CDCl}_3$ ) of **3d**

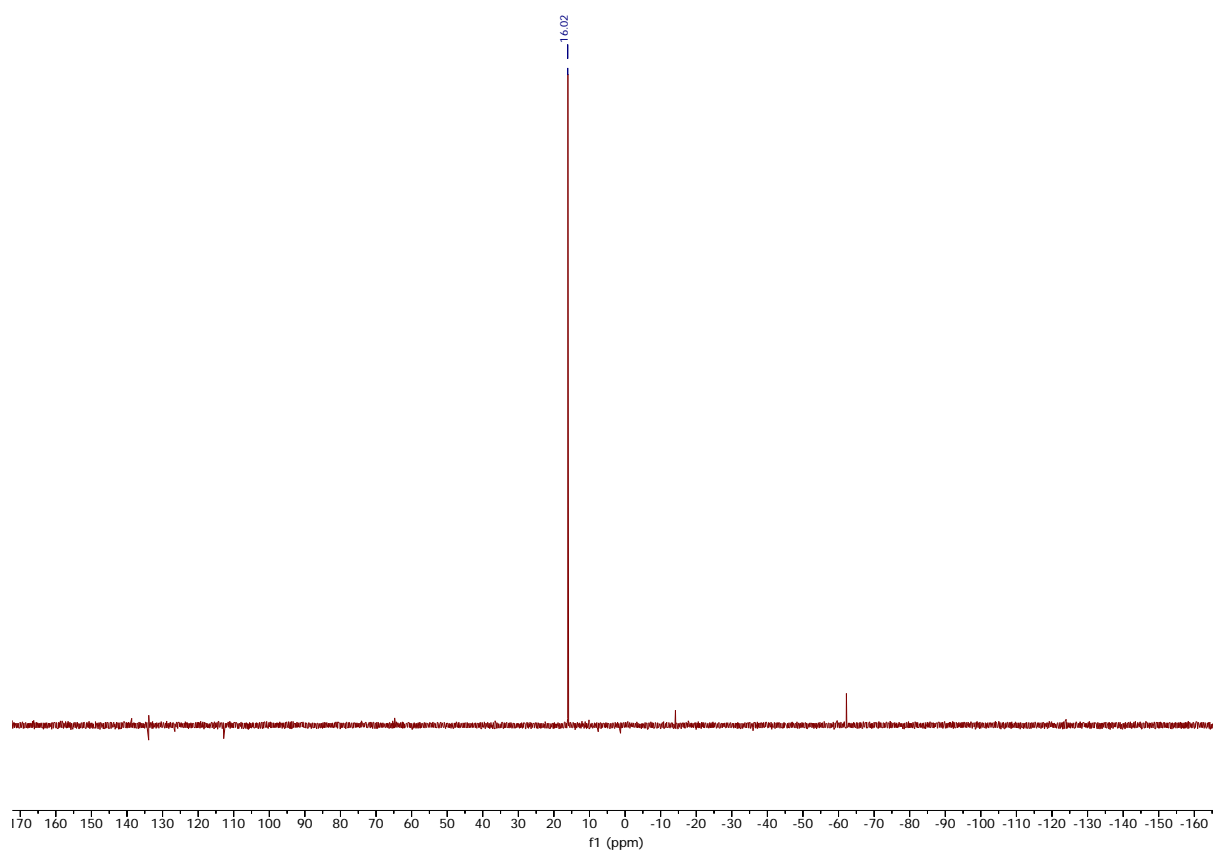

**Figure S36**  $^{31}\text{P}\{^1\text{H}\}$  NMR spectrum (162 MHz,  $\text{CDCl}_3$ ) of **3d**

## References

- 1 a) L. Falivene, Z. Cao, A. Petta, L. Serra, A. Poater, R. Oliva, V. Scarano and L. Cavallo, *Nat. Chem.*, 2019, **11**, 872; b) L. Falivene, R. Cudenchino, A. Poater, A. Petta, L. Serra, R. Oliva, V. Scarano and L. Cavallo, *Organometallics*, 2016, **35**, 2286.
- 2 A. Poater, F. Ragone, R. Mariz, R. Dorta and L. Cavallo, *Chem. Eur. J.*, 2010, **16**, 14348.
